# Supplementary material for: Where are the Penaeids crustins?
Source: PeerJ. 2023 Jul 20;11:e15596. doi: 10.7717/peerj.15596 (PMC10363340; doi:10.7717/peerj.15596)
Supplement: Table S2 — Number of hits per query with E value < =9.9E−20 and their distribution in groups by frequency. [file peerj-11-15596-s002.xlsx]

## Sheet: Sheet1
		Hits with the group				Total hits
group	accnum	A	B	C	Other		%group													Subject	A	B	C	Total
A	XP_027209751	0	0	0	3	3	0													XP_037772705	0	0	48	48	1	0.0065182	0.0065182
A	UGN74322	3	0	0	3	6	50													XP_027209425	1	7	24	32	0.75	0.00434546	0.0108637
A	QOL09959	2	0	0	5	7	28.5714													XP_027208053	3	4	24	31	0.774194	0.00420967	0.0150733
A	QOL09953	1	0	0	6	7	14.2857													AYP74901	5	2	24	31	0.774194	0.00420967	0.019283
A	ROT70667	2	0	0	5	7	28.5714													XP_042882182	0	7	24	31	0.774194	0.00420967	0.0234927
A	BBD52152	2	0	0	5	7	28.5714													XP_042882174	0	7	24	31	0.774194	0.00420967	0.0277023
A	XP_047478805	1	0	0	6	7	14.2857													XP_042882178	0	7	24	31	0.774194	0.00420967	0.031912
A	QOL09948	3	0	0	5	8	37.5													XP_042882192	0	7	24	31	0.774194	0.00420967	0.0361217
A	QOL09946	3	0	0	5	8	37.5													XP_042882183	0	7	24	31	0.774194	0.00420967	0.0403313
A	QOL09944	3	0	0	5	8	37.5													XP_042882180	0	7	24	31	0.774194	0.00420967	0.044541
A	UGN74323	3	0	0	5	8	37.5													XP_042882194	0	7	24	31	0.774194	0.00420967	0.0487507
A	QOL09967	3	0	0	6	9	33.3333													XP_042882170	0	7	24	31	0.774194	0.00420967	0.0529603
A	QOL09952	3	0	0	6	9	33.3333		0-50	41										XP_042882164	0	7	24	31	0.774194	0.00420967	0.05717
A	XP_047486628	3	0	0	6	9	33.3333		50-100	1										XP_042882171	0	7	24	31	0.774194	0.00420967	0.0613797
A	QOL09947	1	0	0	9	10	10		100-150	4										XP_042882181	0	7	24	31	0.774194	0.00420967	0.0655894
A	ATU82299	3	0	0	7	10	30		150-200	2										XP_027209420	0	7	24	31	0.774194	0.00420967	0.069799
A	XP_027219667	2	0	0	8	10	20		200-250	24										XP_027209421	0	7	24	31	0.774194	0.00420967	0.0740087
A	QOL09945	1	0	0	11	12	8.33333			72										XP_027209424	0	7	24	31	0.774194	0.00420967	0.0782184
A	ROT60598	1	0	0	11	12	8.33333													XP_027209435	0	7	24	31	0.774194	0.00420967	0.082428
A	QOL09963	2	0	0	12	14	14.2857													XP_027209436	0	7	24	31	0.774194	0.00420967	0.0866377
A	QOL09960	1	0	0	17	18	5.55556													XP_027209423	0	7	24	31	0.774194	0.00420967	0.0908474
A	XP_027213162	1	0	0	17	18	5.55556													XP_027209427	0	7	24	31	0.774194	0.00420967	0.095057
A	UKP15100	14	0	0	5	19	73.6842													XP_027209430	0	7	24	31	0.774194	0.00420967	0.0992667
A	QCQ82550	14	0	0	5	19	73.6842													XP_027209431	0	7	24	31	0.774194	0.00420967	0.103476
A	QHD40387	14	0	0	5	19	73.6842													XP_027209432	0	7	24	31	0.774194	0.00420967	0.107686
A	ACT82964	14	0	0	5	19	73.6842													XP_042882169	0	7	24	31	0.774194	0.00420967	0.111896
A	AGA83302	14	0	0	5	19	73.6842													XP_042882168	0	7	24	31	0.774194	0.00420967	0.116105
A	ACT82963	14	0	0	5	19	73.6842													XP_042882151	0	7	24	31	0.774194	0.00420967	0.120315
A	ADC32522	14	0	0	5	19	73.6842													XP_027208052	2	4	24	30	0.8	0.00407387	0.124389
A	ACL97378	14	0	0	5	19	73.6842													XP_037772467	0	6	24	30	0.8	0.00407387	0.128463
A	ACL97377	14	0	0	5	19	73.6842													XP_042882190	0	6	24	30	0.8	0.00407387	0.132537
A	ACL97376	14	0	0	5	19	73.6842													XP_042882186	0	6	24	30	0.8	0.00407387	0.136611
A	ACL97375	14	0	0	5	19	73.6842													XP_042882161	0	6	24	30	0.8	0.00407387	0.140684
A	ACL97374	14	0	0	5	19	73.6842													XP_042882159	0	6	24	30	0.8	0.00407387	0.144758
A	ADV17347	15	0	0	5	20	75													XP_027209419	0	6	24	30	0.8	0.00407387	0.148832
A	XP_047502940	14	0	0	6	20	70													XP_027209422	0	6	24	30	0.8	0.00407387	0.152906
A	ACV84092	14	0	0	7	21	66.6667													XP_037772600	0	6	24	30	0.8	0.00407387	0.15698
A	XP_027224107	16	0	0	6	22	72.7273													XP_037772614	0	6	24	30	0.8	0.00407387	0.161054
A	XP_037792256	3	0	2	25	30	10													XP_047502712	0	6	24	30	0.8	0.00407387	0.165128
A	QOL09961	3	0	2	26	31	9.67742													XP_037772787	0	6	24	30	0.8	0.00407387	0.169202
A	XP_027227947	3	0	2	28	33	0													XP_047502716	0	6	24	30	0.8	0.00407387	0.173275
B	QOL09968	0	1	1	63	65	1.53846													XP_037772383	0	6	24	30	0.8	0.00407387	0.177349
B	ACQ66005	0	3	8	110	121	2.47934													XP_042882193	0	6	24	30	0.8	0.00407387	0.181423
B	BCG55620	0	3	11	109	123	2.43902													XP_042882195	0	6	24	30	0.8	0.00407387	0.185497
B	BCG55621	0	3	13	116	132	2.27273													XP_042882172	0	6	24	30	0.8	0.00407387	0.189571
B	BCG55622	0	3	11	125	139	2.15827													XP_042882185	0	6	24	30	0.8	0.00407387	0.193645
B	QOL09964	1	2	4	147	154	1.2987													XP_042882173	0	6	24	30	0.8	0.00407387	0.197719
B	QOL09962	1	2	6	175	184	1.08696													XP_047468320	3	3	23	29	0.793103	0.00393808	0.201657
C	ACQ66004	3	4	23	185	215	10.6977													XP_042882187	0	5	24	29	0.827586	0.00393808	0.205595
C	ABW82154	2	4	23	186	215	10.6977													XP_042882162	0	5	24	29	0.827586	0.00393808	0.209533
C	BAD15063	0	1	21	198	220	9.54545													XP_042882184	0	5	24	29	0.827586	0.00393808	0.213471
C	BAD15064	0	2	23	209	234	9.82906													XP_027209438	0	5	24	29	0.827586	0.00393808	0.217409
C	QOL09966	0	4	21	210	235	8.93617													XP_027209437	0	5	24	29	0.827586	0.00393808	0.221347
C	BBC42584	0	5	23	208	236	9.74576													XP_037772702	0	5	24	29	0.827586	0.00393808	0.225285
C	BAD15065	0	4	22	214	240	9.16667													XP_037772783	0	5	24	29	0.827586	0.00393808	0.229223
C	XP_047468328	0	4	23	213	240	9.58333													XP_037772785	0	5	24	29	0.827586	0.00393808	0.233161
C	QCQ82549	3	4	23	212	242	9.50413													XP_037772598	0	5	24	29	0.827586	0.00393808	0.237099
C	BAD15062	0	4	22	223	249	8.83534													XP_037772611	0	5	24	29	0.827586	0.00393808	0.241037
C	QOL09958	1	4	23	222	250	9.2													XP_037772699	0	5	24	29	0.827586	0.00393808	0.244976
C	QOL09955	3	4	22	221	250	8.8													XP_047502713	0	5	24	29	0.827586	0.00393808	0.248914
C	QOL09943	1	4	23	222	250	9.2													XP_047502715	0	5	24	29	0.827586	0.00393808	0.252852
C	BBD52151	1	4	23	222	250	9.2													XP_047502708	0	5	24	29	0.827586	0.00393808	0.25679
C	BBC42585	0	4	21	225	250	8.4													AAL36892	0	5	24	29	0.827586	0.00393808	0.260728
C	ACZ43781	0	4	23	223	250	9.2													AAL36894	0	5	24	29	0.827586	0.00393808	0.264666
C	AAS57715	0	4	23	224	251	9.16335													AAL36897	0	5	24	29	0.827586	0.00393808	0.268604
C	ABO93323	0	4	23	224	251	9.16335													XP_047502705	0	5	24	29	0.827586	0.00393808	0.272542
C	ABQ96197	0	4	23	224	251	9.16335													XP_047502706	0	5	24	29	0.827586	0.00393808	0.27648
C	ABM63362	0	4	23	224	251	9.16335													XP_037772615	0	5	24	29	0.827586	0.00393808	0.280418
C	ABM63361	0	4	22	225	251	8.76494													XP_037772605	0	5	24	29	0.827586	0.00393808	0.284356
C	ADF80918	0	4	23	224	251	9.16335													XP_042882163	0	7	22	29	0.758621	0.00393808	0.288294
C	BAD15066	0	5	23	223	251	9.16335													XP_037772606	0	5	24	29	0.827586	0.00393808	0.292232
C	XP_027208055	0	4	23	224	251	9.16335													XP_037772592	0	5	24	29	0.827586	0.00393808	0.296171
	Total hits					7364														XP_037772346	0	5	24	29	0.827586	0.00393808	0.300109
																				XP_037772609	0	5	24	29	0.827586	0.00393808	0.304047
																				XP_037805208	0	5	24	29	0.827586	0.00393808	0.307985
																				XP_037772593	0	5	24	29	0.827586	0.00393808	0.311923
																				XP_037772597	0	5	24	29	0.827586	0.00393808	0.315861
																				XP_047502707	0	5	24	29	0.827586	0.00393808	0.319799
																				XP_037772595	0	5	24	29	0.827586	0.00393808	0.323737
																				XP_037772594	0	5	24	29	0.827586	0.00393808	0.327675
																				XP_037772491	0	4	24	28	0.857143	0.00380228	0.331477
																				XP_037772498	0	4	24	28	0.857143	0.00380228	0.33528
																				XP_047468325	3	1	24	28	0.857143	0.00380228	0.339082
																				XP_047468324	3	1	24	28	0.857143	0.00380228	0.342884
																				XP_042882153	0	4	24	28	0.857143	0.00380228	0.346687
																				XP_047468303	0	4	24	28	0.857143	0.00380228	0.350489
																				XP_047502908	0	4	24	28	0.857143	0.00380228	0.354291
																				AAL36898	3	1	24	28	0.857143	0.00380228	0.358093
																				XP_042865726	0	4	24	28	0.857143	0.00380228	0.361896
																				ABQ96197	0	5	23	28	0.821429	0.00380228	0.365698
																				ABO93323	0	5	23	28	0.821429	0.00380228	0.3695
																				XP_027208051	0	4	24	28	0.857143	0.00380228	0.373303
																				XP_027208063	0	4	24	28	0.857143	0.00380228	0.377105
																				XP_047468302	0	4	24	28	0.857143	0.00380228	0.380907
																				XP_037772613	0	4	24	28	0.857143	0.00380228	0.384709
																				XP_037772607	0	4	24	28	0.857143	0.00380228	0.388512
																				XP_047468346	0	4	24	28	0.857143	0.00380228	0.392314
																				XP_027208050	0	4	24	28	0.857143	0.00380228	0.396116
																				AAL36891	0	4	24	28	0.857143	0.00380228	0.399919
																				AAL36895	0	4	24	28	0.857143	0.00380228	0.403721
																				XP_027208055	0	5	23	28	0.821429	0.00380228	0.407523
																				AAL36893	0	4	24	28	0.857143	0.00380228	0.411325
																				XP_047502710	0	4	24	28	0.857143	0.00380228	0.415128
																				XP_037772616	0	4	24	28	0.857143	0.00380228	0.41893
																				XP_047502701	0	4	24	28	0.857143	0.00380228	0.422732
																				XP_047502711	0	4	24	28	0.857143	0.00380228	0.426534
																				XP_047468345	0	4	24	28	0.857143	0.00380228	0.430337
																				XP_042882167	0	4	24	28	0.857143	0.00380228	0.434139
																				XP_047502703	0	4	24	28	0.857143	0.00380228	0.437941
																				XP_047468348	0	4	24	28	0.857143	0.00380228	0.441744
																				XP_037772366	0	4	24	28	0.857143	0.00380228	0.445546
																				XP_037772379	0	4	24	28	0.857143	0.00380228	0.449348
																				XP_037772782	0	4	24	28	0.857143	0.00380228	0.45315
																				ROT82062	0	4	24	28	0.857143	0.00380228	0.456953
																				XP_037772617	0	4	24	28	0.857143	0.00380228	0.460755
																				XP_037772556	0	4	24	28	0.857143	0.00380228	0.464557
																				XP_047502834	0	4	23	27	0.851852	0.00366649	0.468224
																				XP_027208057	3	0	24	27	0.888889	0.00366649	0.47189
																				XP_027208059	3	0	24	27	0.888889	0.00366649	0.475557
																				ROT82064	3	0	24	27	0.888889	0.00366649	0.479223
																				XP_047468326	3	0	24	27	0.888889	0.00366649	0.48289
																				XP_047468321	0	4	23	27	0.851852	0.00366649	0.486556
																				QOL09955	0	4	23	27	0.851852	0.00366649	0.490223
																				XP_042882197	0	3	24	27	0.888889	0.00366649	0.493889
																				ACZ43781	0	4	23	27	0.851852	0.00366649	0.497556
																				XP_027208058	3	0	24	27	0.888889	0.00366649	0.501222
																				XP_027208060	3	0	24	27	0.888889	0.00366649	0.504889
																				XP_047486944	0	3	24	27	0.888889	0.00366649	0.508555
																				QIV66989	0	3	24	27	0.888889	0.00366649	0.512222
																				XP_037792128	0	3	24	27	0.888889	0.00366649	0.515888
																				ACU25385	0	3	24	27	0.888889	0.00366649	0.519555
																				BBC42584	0	5	22	27	0.814815	0.00366649	0.523221
																				XP_047486897	0	3	24	27	0.888889	0.00366649	0.526888
																				XP_037792129	0	3	24	27	0.888889	0.00366649	0.530554
																				XP_037772704	0	3	24	27	0.888889	0.00366649	0.534221
																				ABM63362	0	4	23	27	0.851852	0.00366649	0.537887
																				XP_047502709	0	4	23	27	0.851852	0.00366649	0.541554
																				XP_047502985	0	4	23	27	0.851852	0.00366649	0.54522
																				XP_037772348	0	4	23	27	0.851852	0.00366649	0.548886
																				XP_047468347	0	4	23	27	0.851852	0.00366649	0.552553
																				XP_037772781	0	4	23	27	0.851852	0.00366649	0.556219
																				AAS57715	0	4	23	27	0.851852	0.00366649	0.559886
																				XP_047468330	0	2	24	26	0.923077	0.00353069	0.563417
																				XP_037772780	0	2	24	26	0.923077	0.00353069	0.566947
																				QOL09943	3	0	23	26	0.884615	0.00353069	0.570478
																				QOL09966	0	3	23	26	0.884615	0.00353069	0.574009
																				QCQ82549	3	0	23	26	0.884615	0.00353069	0.577539
																				XP_042882166	0	4	22	26	0.846154	0.00353069	0.58107
																				XP_042882152	0	3	23	26	0.884615	0.00353069	0.584601
																				BCG55621	0	3	23	26	0.884615	0.00353069	0.588131
																				ACQ66005	0	3	23	26	0.884615	0.00353069	0.591662
																				XP_042882154	0	2	24	26	0.923077	0.00353069	0.595193
																				KAF2367915	0	0	26	26	1	0.00353069	0.598724
																				ACU25382	0	2	24	26	0.923077	0.00353069	0.602254
																				XP_027209442	0	2	24	26	0.923077	0.00353069	0.605785
																				XP_027209440	0	2	24	26	0.923077	0.00353069	0.609316
																				ABM63361	0	3	23	26	0.884615	0.00353069	0.612846
																				AAS59735	0	2	24	26	0.923077	0.00353069	0.616377
																				XP_027208047	0	2	24	26	0.923077	0.00353069	0.619908
																				XP_037772523	0	1	24	25	0.96	0.00339489	0.623303
																				XP_027222512	0	1	24	25	0.96	0.00339489	0.626697
																				BBD52151	0	2	23	25	0.92	0.00339489	0.630092
																				XP_027208049	1	0	24	25	0.96	0.00339489	0.633487
																				XP_027208066	0	1	24	25	0.96	0.00339489	0.636882
																				XP_042882156	0	1	24	25	0.96	0.00339489	0.640277
																				XP_037772345	0	1	24	25	0.96	0.00339489	0.643672
																				BBC42585	0	2	23	25	0.92	0.00339489	0.647067
																				XP_042882191	0	2	23	25	0.92	0.00339489	0.650462
																				BCG55622	0	3	22	25	0.88	0.00339489	0.653857
																				BCG55620	0	3	22	25	0.88	0.00339489	0.657251
																				XP_042883940	0	2	23	25	0.92	0.00339489	0.660646
																				XP_042883943	0	3	22	25	0.88	0.00339489	0.664041
																				XP_042865729	0	1	24	25	0.96	0.00339489	0.667436
																				ACU25383	0	1	24	25	0.96	0.00339489	0.670831
																				XP_042883942	0	2	23	25	0.92	0.00339489	0.674226
																				AGF92153	0	2	23	25	0.92	0.00339489	0.677621
																				AGU01545	0	2	23	25	0.92	0.00339489	0.681016
																				AFO68120	0	2	23	25	0.92	0.00339489	0.684411
																				XP_027208048	0	1	24	25	0.96	0.00339489	0.687806
																				XP_027208064	0	1	24	25	0.96	0.00339489	0.6912
																				ADF80918	0	3	22	25	0.88	0.00339489	0.694595
																				XP_027208056	0	1	24	25	0.96	0.00339489	0.69799
																				QOL09958	0	1	23	24	0.958333	0.0032591	0.701249
																				XP_042882157	0	0	24	24	1	0.0032591	0.704508
																				XP_042882158	0	0	24	24	1	0.0032591	0.707768
																				XP_027208061	0	0	24	24	1	0.0032591	0.711027
																				XP_042858712	0	1	23	24	0.958333	0.0032591	0.714286
																				BAD15066	0	3	21	24	0.875	0.0032591	0.717545
																				AAL36896	0	0	24	24	1	0.0032591	0.720804
																				XP_042240247	0	1	23	24	0.958333	0.0032591	0.724063
																				XP_037791431	0	2	22	24	0.916667	0.0032591	0.727322
																				XP_037792134	0	2	22	24	0.916667	0.0032591	0.730581
																				XP_027209461	0	2	22	24	0.916667	0.0032591	0.73384
																				XP_027209460	0	2	22	24	0.916667	0.0032591	0.737099
																				XP_027209458	0	2	22	24	0.916667	0.0032591	0.740359
																				XP_047487836	0	2	22	24	0.916667	0.0032591	0.743618
																				XP_027209443	0	2	22	24	0.916667	0.0032591	0.746877
																				XP_037792136	0	2	22	24	0.916667	0.0032591	0.750136
																				XP_037792130	0	2	22	24	0.916667	0.0032591	0.753395
																				XP_047487868	0	2	22	24	0.916667	0.0032591	0.756654
																				AYM00403	0	2	22	24	0.916667	0.0032591	0.759913
																				XP_047487859	0	2	22	24	0.916667	0.0032591	0.763172
																				XP_037792132	0	2	22	24	0.916667	0.0032591	0.766431
																				XP_037792135	0	2	22	24	0.916667	0.0032591	0.76969
																				XP_047487824	0	2	22	24	0.916667	0.0032591	0.772949
																				XP_047487841	0	2	22	24	0.916667	0.0032591	0.776209
																				XP_042883941	0	2	22	24	0.916667	0.0032591	0.779468
																				XP_037772465	0	0	24	24	1	0.0032591	0.782727
																				XP_027208065	0	0	24	24	1	0.0032591	0.785986
																				XP_042883946	0	2	22	24	0.916667	0.0032591	0.789245
																				XP_027209444	0	2	22	24	0.916667	0.0032591	0.792504
																				XP_042883945	0	2	22	24	0.916667	0.0032591	0.795763
																				XP_047487823	0	2	22	24	0.916667	0.0032591	0.799022
																				XP_037792133	0	2	22	24	0.916667	0.0032591	0.802281
																				XP_037792131	0	2	22	24	0.916667	0.0032591	0.80554
																				XP_047503024	0	0	24	24	1	0.0032591	0.8088
																				XP_047468328	0	0	23	23	1	0.0031233	0.811923
																				XP_037772588	0	0	23	23	1	0.0031233	0.815046
																				QXT26515	0	1	22	23	0.956522	0.0031233	0.818169
																				XP_047468323	0	0	23	23	1	0.0031233	0.821293
																				XP_037772701	0	0	23	23	1	0.0031233	0.824416
																				BAD15065	0	0	23	23	1	0.0031233	0.827539
																				BAD15064	0	0	23	23	1	0.0031233	0.830663
																				BAD15062	0	1	22	23	0.956522	0.0031233	0.833786
																				ANH22232	0	2	21	23	0.913043	0.0031233	0.836909
																				MPC13990	0	3	20	23	0.869565	0.0031233	0.840033
																				XP_045136931	0	3	20	23	0.869565	0.0031233	0.843156
																				QIV66988	0	0	23	23	1	0.0031233	0.846279
																				XP_037772832	0	0	22	22	1	0.00298751	0.849267
																				ACQ66004	0	0	22	22	1	0.00298751	0.852254
																				XP_037772831	0	0	22	22	1	0.00298751	0.855242
																				KAG7170693	0	3	19	22	0.863636	0.00298751	0.858229
																				QEQ76263	0	1	21	22	0.954545	0.00298751	0.861217
																				ABW82154	0	0	21	21	1	0.00285171	0.864068
																				BAD15063	0	0	21	21	1	0.00285171	0.86692
																				XP_042219314	0	2	19	21	0.904762	0.00285171	0.869772
																				KAF2362927	0	1	20	21	0.952381	0.00285171	0.872624
																				XP_018017888	3	1	17	21	0.809524	0.00285171	0.875475
																				XP_027238759	0	2	18	20	0.9	0.00271592	0.878191
																				XP_027209462	0	2	18	20	0.9	0.00271592	0.880907
																				XP_042219299	0	3	17	20	0.85	0.00271592	0.883623
																				XP_047502989	0	0	19	19	1	0.00258012	0.886203
																				ABQ96198	0	0	18	18	1	0.00244432	0.888647
																				RXG55646	0	1	15	16	0.9375	0.00217273	0.89082
																				QIE09215	2	3	11	16	0.6875	0.00217273	0.892993
																				ROT68344	16	0	0	16	0	0.00217273	0.895166
																				XP_042865728	16	0	0	16	0	0.00217273	0.897338
																				AVG44186	16	0	0	16	0	0.00217273	0.899511
																				XP_037772356	16	0	0	16	0	0.00217273	0.901684
																				XP_037772357	16	0	0	16	0	0.00217273	0.903857
																				XP_047736705	0	1	14	15	0.933333	0.00203694	0.905894
																				XP_027224107	15	0	0	15	0	0.00203694	0.90793
																				QCQ82550	15	0	0	15	0	0.00203694	0.909967
																				XP_047502940	15	0	0	15	0	0.00203694	0.912004
																				ACL97378	15	0	0	15	0	0.00203694	0.914041
																				ACL97376	15	0	0	15	0	0.00203694	0.916078
																				ACL97377	15	0	0	15	0	0.00203694	0.918115
																				ACL97375	15	0	0	15	0	0.00203694	0.920152
																				AGA83302	15	0	0	15	0	0.00203694	0.922189
																				ACT82963	15	0	0	15	0	0.00203694	0.924226
																				ADC32522	15	0	0	15	0	0.00203694	0.926263
																				ACT82964	15	0	0	15	0	0.00203694	0.9283
																				QHD40387	15	0	0	15	0	0.00203694	0.930337
																				ACV84092	15	0	0	15	0	0.00203694	0.932374
																				UKP15100	15	0	0	15	0	0.00203694	0.934411
																				ACL97374	15	0	0	15	0	0.00203694	0.936448
																				XP_018011805	0	1	12	13	0.923077	0.00176534	0.938213
																				XP_047487753	5	0	7	12	0.583333	0.00162955	0.939842
																				KAG7172931	2	1	8	11	0.727273	0.00149375	0.941336
																				KAG0722485	3	1	6	10	0.6	0.00135796	0.942694
																				XP_027227947	4	0	6	10	0.6	0.00135796	0.944052
																				XP_042219313	0	1	8	9	0.888889	0.00122216	0.945274
																				KAF2367912	0	0	9	9	1	0.00122216	0.946496
																				KAA0200687	0	0	9	9	1	0.00122216	0.947719
																				XP_037797646	3	2	3	8	0.375	0.00108637	0.948805
																				QOL09961	4	0	4	8	0.5	0.00108637	0.949891
																				XP_037792256	3	0	4	7	0.571429	0.00095057	0.950842
																				XP_047502984	0	0	7	7	1	0.00095057	0.951793
																				XP_037792051	0	2	4	6	0.666667	0.000814775	0.952607
																				XP_042892210	4	0	2	6	0.333333	0.000814775	0.953422
																				QHG61850	0	0	6	6	1	0.000814775	0.954237
																				XP_047501421	3	2	0	5	0	0.000678979	0.954916
																				XP_037797654	3	2	0	5	0	0.000678979	0.955595
																				XP_042891671	3	2	0	5	0	0.000678979	0.956274
																				XP_037797655	3	2	0	5	0	0.000678979	0.956953
																				XP_042891674	3	2	0	5	0	0.000678979	0.957632
																				XP_042891675	3	2	0	5	0	0.000678979	0.958311
																				XP_042203450	2	3	0	5	0	0.000678979	0.95899
																				KAB7505808	0	0	4	4	1	0.000543183	0.959533
																				XP_027212782	4	0	0	4	0	0.000543183	0.960076
																				XP_037799609	4	0	0	4	0	0.000543183	0.960619
																				XP_042858363	4	0	0	4	0	0.000543183	0.961162
																				XP_037799606	4	0	0	4	0	0.000543183	0.961706
																				AFO66774	0	0	4	4	1	0.000543183	0.962249
																				QHG61851	0	0	4	4	1	0.000543183	0.962792
																				QOL09962	0	2	2	4	0.5	0.000543183	0.963335
																				ROT79125	0	3	1	4	0.25	0.000543183	0.963878
																				XP_027235946	0	3	1	4	0.25	0.000543183	0.964422
																				RXG72923	0	0	4	4	1	0.000543183	0.964965
																				ROT76239	4	0	0	4	0	0.000543183	0.965508
																				XP_027212734	4	0	0	4	0	0.000543183	0.966051
																				XP_042887162	4	0	0	4	0	0.000543183	0.966594
																				XP_027219918	4	0	0	4	0	0.000543183	0.967137
																				XP_047486650	4	0	0	4	0	0.000543183	0.967681
																				ATU82299	4	0	0	4	0	0.000543183	0.968224
																				XP_047501470	3	1	0	4	0	0.000543183	0.968767
																				XP_037797647	3	1	0	4	0	0.000543183	0.96931
																				XP_047501419	3	1	0	4	0	0.000543183	0.969853
																				XP_037792257	4	0	0	4	0	0.000543183	0.970397
																				XP_047487751	4	0	0	4	0	0.000543183	0.97094
																				XP_027227946	4	0	0	4	0	0.000543183	0.971483
																				ROT65612	4	0	0	4	0	0.000543183	0.972026
																				QOL09960	2	2	0	4	0	0.000543183	0.972569
																				QOL09952	3	0	0	3	0	0.000407387	0.972977
																				XP_047486628	3	0	0	3	0	0.000407387	0.973384
																				UGN74322	3	0	0	3	0	0.000407387	0.973791
																				XP_042231937	3	0	0	3	0	0.000407387	0.974199
																				XP_042231938	3	0	0	3	0	0.000407387	0.974606
																				XP_037799929	3	0	0	3	0	0.000407387	0.975014
																				QOL09968	0	2	1	3	0.333333	0.000407387	0.975421
																				XP_042203452	0	2	1	3	0.333333	0.000407387	0.975828
																				XP_042203453	0	2	1	3	0.333333	0.000407387	0.976236
																				XP_027220913	3	0	0	3	0	0.000407387	0.976643
																				XP_047487758	3	0	0	3	0	0.000407387	0.977051
																				XP_037791855	3	0	0	3	0	0.000407387	0.977458
																				XP_037791856	3	0	0	3	0	0.000407387	0.977865
																				XP_042892208	3	0	0	3	0	0.000407387	0.978273
																				QOL09948	3	0	0	3	0	0.000407387	0.97868
																				UGN74323	3	0	0	3	0	0.000407387	0.979087
																				QOL09946	3	0	0	3	0	0.000407387	0.979495
																				QOL09944	3	0	0	3	0	0.000407387	0.979902
																				XP_047487047	0	2	1	3	0.333333	0.000407387	0.98031
																				XP_047487099	2	1	0	3	0	0.000407387	0.980717
																				XP_027209457	2	1	0	3	0	0.000407387	0.981124
																				XP_037791430	2	1	0	3	0	0.000407387	0.981532
																				XP_037797797	3	0	0	3	0	0.000407387	0.981939
																				XP_037797653	3	0	0	3	0	0.000407387	0.982347
																				XP_037773886	3	0	0	3	0	0.000407387	0.982754
																				XP_047489831	3	0	0	3	0	0.000407387	0.983161
																				QOL09967	3	0	0	3	0	0.000407387	0.983569
																				XP_027236662	3	0	0	3	0	0.000407387	0.983976
																				AGU01544	0	3	0	3	0	0.000407387	0.984383
																				XP_042888364	0	3	0	3	0	0.000407387	0.984791
																				XP_037797838	0	3	0	3	0	0.000407387	0.985198
																				KAG7156562	0	3	0	3	0	0.000407387	0.985606
																				XP_027235862	0	3	0	3	0	0.000407387	0.986013
																				XP_042888360	0	3	0	3	0	0.000407387	0.98642
																				XP_047501233	0	3	0	3	0	0.000407387	0.986828
																				ROT79124	0	3	0	3	0	0.000407387	0.987235
																				XP_042888363	0	3	0	3	0	0.000407387	0.987643
																				XP_047501234	0	3	0	3	0	0.000407387	0.98805
																				XP_047501231	0	3	0	3	0	0.000407387	0.988457
																				KAG7158892	1	1	0	2	0	0.000271592	0.988729
																				XP_042240018	1	1	0	2	0	0.000271592	0.989001
																				ROT70667	2	0	0	2	0	0.000271592	0.989272
																				QOL09959	2	0	0	2	0	0.000271592	0.989544
																				XP_027212736	2	0	0	2	0	0.000271592	0.989815
																				XP_027210313	2	0	0	2	0	0.000271592	0.990087
																				XP_027211693	2	0	0	2	0	0.000271592	0.990359
																				XP_027212735	2	0	0	2	0	0.000271592	0.99063
																				XP_042892933	2	0	0	2	0	0.000271592	0.990902
																				XP_027210312	2	0	0	2	0	0.000271592	0.991173
																				XP_042892937	2	0	0	2	0	0.000271592	0.991445
																				XP_027211690	2	0	0	2	0	0.000271592	0.991716
																				XP_027211691	2	0	0	2	0	0.000271592	0.991988
																				XP_037799930	2	0	0	2	0	0.000271592	0.99226
																				XP_047486774	2	0	0	2	0	0.000271592	0.992531
																				XP_027219905	2	0	0	2	0	0.000271592	0.992803
																				XP_027220026	2	0	0	2	0	0.000271592	0.993074
																				XP_042892931	2	0	0	2	0	0.000271592	0.993346
																				AME17866	2	0	0	2	0	0.000271592	0.993618
																				XP_047486507	2	0	0	2	0	0.000271592	0.993889
																				XP_047486506	2	0	0	2	0	0.000271592	0.994161
																				XP_045619733	2	0	0	2	0	0.000271592	0.994432
																				XP_027219394	2	0	0	2	0	0.000271592	0.994704
																				XP_027219395	2	0	0	2	0	0.000271592	0.994976
																				XP_042208489	2	0	0	2	0	0.000271592	0.995247
																				XP_042208488	2	0	0	2	0	0.000271592	0.995519
																				KAG7154023	2	0	0	2	0	0.000271592	0.99579
																				BBD52152	2	0	0	2	0	0.000271592	0.996062
																				XP_037797657	2	0	0	2	0	0.000271592	0.996334
																				XP_027213162	2	0	0	2	0	0.000271592	0.996605
																				AUV47159	0	2	0	2	0	0.000271592	0.996877
																				XP_037797669	0	2	0	2	0	0.000271592	0.997148
																				XP_027235850	0	2	0	2	0	0.000271592	0.99742
																				XP_045581858	0	0	1	1	1	0.000135796	0.997556
																				ROT60598	1	0	0	1	0	0.000135796	0.997691
																				XP_027219667	1	0	0	1	0	0.000135796	0.997827
																				ABP88043	1	0	0	1	0	0.000135796	0.997963
																				XP_047478805	1	0	0	1	0	0.000135796	0.998099
																				ROT79126	0	1	0	1	0	0.000135796	0.998235
																				QOL09964	0	1	0	1	0	0.000135796	0.99837
																				ACU25384	0	1	0	1	0	0.000135796	0.998506
																				XP_042226651	0	1	0	1	0	0.000135796	0.998642
																				KAG7166545	0	1	0	1	0	0.000135796	0.998778
																				XP_042868296	0	1	0	1	0	0.000135796	0.998914
																				QOL09945	1	0	0	1	0	0.000135796	0.999049
																				XP_037792991	1	0	0	1	0	0.000135796	0.999185
																				XP_042878482	1	0	0	1	0	0.000135796	0.999321
																				XP_045615266	1	0	0	1	0	0.000135796	0.999457
																				QOL09947	1	0	0	1	0	0.000135796	0.999593
																				QOL09953	1	0	0	1	0	0.000135796	0.999728
																				XP_042231939	1	0	0	1	0	0.000135796	0.999864
																				AAZ76018	1	0	0	1	0	0.000135796	1
																								7364
