# Supplementary material for: Where are the Penaeids crustins?
Source: PeerJ. 2023 Jul 20;11:e15596. doi: 10.7717/peerj.15596 (PMC10363340; doi:10.7717/peerj.15596)
Supplement: Table S5 — Based on the number of different ones, the Cys-rich region is the most conserved, and four motifs are found in more than 45% of the signatures or more than 67% of the selected sequences. [file peerj-11-15596-s005.xlsx]

## Sheet: Sheet1
	Length
	Signature	Cys-rich	Interdomain	4DSC
	58	13	4	41									Cys-rich region						Interdomain				4-DCS domain				Cys-rich region distribution
	58	13	4	41											Frequency
	58	13	4	41									Sequence	Length	N	%	Accumulated		Sequence	Length	N		Sequence	Length	N				Frequency in signature			Frequency in protein
	58	13	4	41									CRYWCKTPEGQAYCC	15	28	0.254545	0.254545		KLGR	4	1		CLDIQATICPHLHLESCRYDTHCEKHEKCCKLTCLPFKVC	40	1		Sequence	Length	N	%	accumulated	N	%	accumulated
	58	13	4	41									CRYWCRTPEGQAYCC	15	11	0.1	0.354545		KPGR	4	11		CPQVRPTCPRFSGPPTTCSNDYKCAGLDKCCFDRCLGEHVC	41	1		CRYWCKTPEGQAYCC	15	28	0.254545	0.254545	92	0.39485	0.39485
	58	13	4	41									CNYCRTRYGYVCC	13	10	0.0909091	0.445455		DRNSGW	6	1		CPQVRPTCPRFHGPPKPCSNDYKCAGLDKCCFDRCLEEHVC	41	1		CRYWCRTPEGQAYCC	15	11	0.1	0.354545	51	0.218884	0.613734
	58	13	4	41									CRRWCRTPEQQVYCC	15	7	0.0636364	0.509091		DRNPGR	6	3		CPDVRRHCLRFKRPPNVCPHDGFCPSNQKCCWDTCLDHHAC	41	1		CNYCRTRYGYVCC	13	10	0.0909091	0.445455	12	0.0515021	0.665236
	58	13	4	41									CRYWCRNPENQVYCC	15	4	0.0363636	0.545455		DSEKHGT	7	1		CPSPPRCTDFFDGNVPSCYIDSDCPRDEKCCEDACNAGKIC	41	1		CRRWCRTPEQQVYCC	15	7	0.0636364	0.509091	8	0.0343348	0.699571
	58	13	4	41									CRRWCRTPEQQAYCC	15	3	0.0272727	0.572727		DDLKPGQ	7	1		CPTVRPSCLRNSGVIPYCRYDTHCEKHEKCCEDACLGQKVC	41	1		CRYWCRNPENQVYCC	15	4	0.0363636	0.545455	5	0.0214592	0.72103
	58	13	4	41									CKYWCRSPENQYYCC	15	2	0.0181818	0.590909		DPSPKPGT	8	1		CPNLRPSCIRSSTIIPYCKYDIHCEKHEKCCEDACLSRKVC	41	1		CRRWCRTPEQQAYCC	15	3	0.0272727	0.572727	4	0.0171674	0.738197
	58	13	4	41									CRYYCKTLSDETYCC	15	2	0.0181818	0.609091		VPSHPNEPQ	9	1		CPEVRGTCPRISNPPDVCPHDGACSPNSKCCYDICLEHHTC	41	1		CRYWCKTPGGQNYCC	15	2	0.0181818	0.590909	6	0.0257511	0.763948
	58	13	4	41									CRRWCETPENAFYCC	15	2	0.0181818	0.627273		VPSHPNEPS	9	1		CPPVRDTCPGIRNRPPICRQDTDCFGSDKCCYDVCLRDSVC	41	1		CRRWCETPENAFYCC	15	2	0.0181818	0.609091	4	0.0171674	0.781116
	65	15	7	43									CRYWCKTPGGQNYCC	15	2	0.0181818	0.645455		DDIAPNEFPT	10	1		CPQIRETCPGLRKGIPICRQDNECFGSDKCCFDTCLNDTVC	41	1		CKYWCRSPENQYYCC	15	2	0.0181818	0.627273	3	0.0128755	0.793991
	65	15	7	43									CRRWCKTPENQAYCC	15	2	0.0181818	0.663636		DGGKDYNEPAEHDGV	15	1		CPQIRETCPGLRKGIPICRQDTDCFGSDKCCFDTCLNDTVC	41	1		CRYYCKTLSDETYCC	15	2	0.0181818	0.645455	2	0.00858369	0.802575
	71	15	15	41									CRYWCKTPENQAYCC	15	2	0.0181818	0.681818		DGGKDYRHPETHDGD	15	1		CPQIRDTCPGLRKGVPICRQDTDCFGSDKCCFDTCLNDTVC	41	1		CRYYCRKWRPEGEERPVYCC	20	2	0.0181818	0.663636	2	0.00858369	0.811159
	72	15	16	41									CRYYCRKWRPEGEERPVYCC	20	2	0.0181818	0.7		ETDLERGPVGTKPLD	15	1		CPQIREICPGLKKGISICRQDNECFGSDKCCFDICLNDTVC	41	1		CRYWCKTPENQAYCC	15	2	0.0181818	0.681818	2	0.00858369	0.819742
	72	15	16	41									CNYCITRYGYVCC	13	1	0.00909091	0.709091		DGGKDYNPPEYHDGN	15	2		CPQVRETCPGLRKGIPICRQDNECFGSDKCCFDTCLNDTVC	41	1		CRRWCKTPENQAYCC	15	2	0.0181818	0.7	2	0.00858369	0.828326
	72	15	16	41									CNYCRTPVGYVCC	13	1	0.00909091	0.718182		ESAHEPETPVGTKPLN	16	1		CPQIRETCPGLRKGIPICRQDNECFGSDKCCFNTCLNDTVC	41	1		CRYWCTTPEGKQYCC	15	1	0.00909091	0.709091	3	0.0128755	0.841202
	72	15	16	41									CRAWCKTPQNQAYCC	15	1	0.00909091	0.727273		ESAHEPETPVGTKLLD	16	1		CPQIRETCPGLRKGIPICRQDNECFGSDKCCFDTCLSDTVC	41	1		CKNWCKAPSGRYECC	15	1	0.00909091	0.718182	2	0.00858369	0.849785
	72	15	16	41									CRYWCRTNFGQYYCC	15	1	0.00909091	0.736364		EDSSEPITIPVVKPGS	16	1		CPPVRDVCPGLRQGVPICRQDTDCFGSDKCCYDVCLNDTVC	41	1		CRRWCRTPEGQAYCC	15	1	0.00909091	0.727273	2	0.00858369	0.858369
	72	15	16	41									CEFWCEARAGKYECC	15	1	0.00909091	0.745455		ETTLEPERPVGTKFLE	16	1		CPDIRRHCLRSKRPPNVCPHDGFCPPRQKCCFDTCLDHHAC	41	1		CRYWCRTPEGQNYCC	15	1	0.00909091	0.736364	2	0.00858369	0.866953
	72	15	15	42									CRYWCKTPQNQAYCC	15	1	0.00909091	0.754545		EDGHDPVSQPFVKPGS	16	1		CPPVRDVCPSTRFGPPVCRQDLDCSGSDKCCYDVCLEDTVC	41	1		CRNWCLTPEKQAYCC	15	1	0.00909091	0.745455	2	0.00858369	0.875536
	72	15	16	41									CKNWCKAPSGRYECC	15	1	0.00909091	0.763636		EGAQQPERPVGTKFGL	16	1		CPQIRPTCPRFHGPPTTCSNDYRCAGLDKCCFDRCLGEHVC	41	1		CRYWCRTPENQAYCC	15	1	0.00909091	0.754545	2	0.00858369	0.88412
	72	15	16	41									CEFWCKTPYNAFYCC	15	1	0.00909091	0.772727		ESAHQPESPVGTKFGR	16	1		CPQVRPTCPRFHGPPTTCSSDYKCAGLDKCCFDRCLEEHVC	41	1		CRAWCKTPQNQAYCC	15	1	0.00909091	0.763636	1	0.00429185	0.888412
	72	15	16	41									CRRWCRTPEGQAYCC	15	1	0.00909091	0.781818		ENVAQPERPVGTKFGS	16	1		CPQVRPTCPRFHGPPNTCSNDFKCAGLDKCCFDRCLGEHVC	41	1		CKVWCRGPNNKRYCC	15	1	0.00909091	0.772727	1	0.00429185	0.892704
	72	15	16	41									CRYWCRTPEGQNYCC	15	1	0.00909091	0.790909		ETVFEPEGPVGTKPNN	16	1		CPQIRPTCPRFHGPPSTCSNDYKCAGLDKCCFDRCLGEHVC	41	1		CRYWCRTNFGQYYCC	15	1	0.00909091	0.781818	1	0.00429185	0.896996
	72	15	16	41									CRNWCLTPEKQAYCC	15	1	0.00909091	0.8		ETRFEPEAPVGTKILD	16	1		CPQVRPTCPRFHGPPTTCSNDYKCAGIDKCCFDRCLGEHVC	41	1		CEFWCEARAGKYECC	15	1	0.00909091	0.790909	1	0.00429185	0.901288
	72	15	16	41									CRYWCTTPEGKQYCC	15	1	0.00909091	0.809091		ESRYEPEAPVGTKILD	16	1		CPQIRPTCPRFHGPPTTCSNDYKCAGLDKCCFDRCLGEHVC	41	1		CRYWCKTPQNQAYCC	15	1	0.00909091	0.8	1	0.00429185	0.905579
	72	15	16	41									CRYWCTTPESKLYCC	15	1	0.00909091	0.818182		ETSFEPEAPVGTKILD	16	1		CPQVRPTCPRFHGPPITCSNDYKCAGLDKCCFDRCLGEHVC	41	1		CARYCPGSAPGSYVCC	16	1	0.00909091	0.809091	1	0.00429185	0.909871
	72	15	16	41									CRYYCINHLEREYCC	15	1	0.00909091	0.827273		ETVYEPETPVGTKPLN	16	1		CPQVRPTCPRFHGPPNTCSNDYKCADLDKCCFDRCLGEHVC	41	1		CEFWCKTPYNAFYCC	15	1	0.00909091	0.818182	1	0.00429185	0.914163
	72	15	16	41									CRRWCRTPEKAVYCC	15	1	0.00909091	0.836364		ETVYEPETPVGTKPLV	16	1		CPQVRPTCPRFHGPPSTCSNDYKCAGLDKCCFDRCLGEHVC	41	1		CENYCEIEGQNNQYECC	17	1	0.00909091	0.827273	1	0.00429185	0.918455
	72	15	16	41									CVYWCKTPDFKFYCC	15	1	0.00909091	0.845455		EGAQQPERPVGTKFGQ	16	1		CPQVRPTCPRFHGPPVTCSSDYKCGGVDKCCFDRCLGEHVC	41	1		CEDYCKIEGQNNQYECC	17	1	0.00909091	0.836364	1	0.00429185	0.922747
	72	15	16	41									CRYYCRTPEDVAYCC	15	1	0.00909091	0.854545		ESAHEPETPVGTKILD	16	1		CPQVRPTCPRFHGPPITCSNDYKCGDLDKCCFDRCLGEHVC	41	1		CKYYCPGPYADQYACC	16	1	0.00909091	0.845455	1	0.00429185	0.927039
	72	15	16	41									CRRWCRTPERAAYCC	15	1	0.00909091	0.863636		ETVHEPETPVGTKPLT	16	1		CPPVRDTCPGIRNRPPICRQDTECFGSDKCCYDTCLNDTVC	41	2		CEDYCEIEGQNNQYECC	17	1	0.00909091	0.854545	1	0.00429185	0.93133
	72	15	16	41									CDIPCTNRFGKEKCC	15	1	0.00909091	0.872727		EGAQQPQRPVGTKFGL	16	1		CPQVRPTCPRFQGPPVTCSHDFKCAGLDKCCFDRCLGEHVC	41	2		CNYCITRYGYVCC	13	1	0.00909091	0.863636	1	0.00429185	0.935622
	72	15	16	41									CRYWCKTLEGQAYCC	15	1	0.00909091	0.881818		EGAQQPQRPVGTKFGQ	16	1		CPQVRPTCPRFHGPPNTCSNDYKCAGLDKCCFDRCLGEHVC	41	2		CRYWCTTPESKLYCC	15	1	0.00909091	0.872727	1	0.00429185	0.939914
	72	15	16	41									CRYWCKTPEDQAYCC	15	1	0.00909091	0.890909		ETAYEPERPVGTKLLE	16	1		CPQVRPTCPRFHGPPTTCSNDYKCAGLDKCCFDRCLGEHVC	41	6		CEDYCEIEERPNHYECC	17	1	0.00909091	0.881818	1	0.00429185	0.944206
	72	15	16	41									CRRWCETPENSFYCC	15	1	0.00909091	0.9		ETVDEPETPVGTKPLN	16	1		CPTVKRPYCPQIHISVRSCRFDTHCEKHEKCCEEPCLTHKVC	42	1		CRYYCINHLEREYCC	15	1	0.00909091	0.890909	1	0.00429185	0.948498
	72	15	16	41									CRRWCRTPEQQTYCC	15	1	0.00909091	0.909091		EHAREPERPVGTKPLN	16	1		CPQVRPTCPRFQGGGPVTCSNDYKCAGIDKCCFDTCLQEHVC	42	1		CRRWCRTPEKAVYCC	15	1	0.00909091	0.9	1	0.00429185	0.95279
	73	15	16	42									CRYWCRTPENQAYCC	15	1	0.00909091	0.918182		ETAFEPEAPVGTKALN	16	1		CPEVRSSCPRFGTNRPDVCPHDGACAPHSKCCFDVCLGHHTC	42	1		CSRWCPGSTPGLFVCC	16	1	0.00909091	0.909091	1	0.00429185	0.957082
	73	15	16	42									CRFWCRTPHGQAYCC	15	1	0.00909091	0.927273		ETAYEPETPVGTKFLE	16	1		CPQVRPTCPNVRSGPPKTCSNDYKCAGADKCCFDRCLEEHVC	42	1		CVYWCKTPDFKFYCC	15	1	0.00909091	0.918182	1	0.00429185	0.961373
	73	15	16	42									CKVWCRGPNNKRYCC	15	1	0.00909091	0.936364		ESDVEPEGPVGTKPLD	16	1		CPQVRPTCPNVRSGPPKTCSNDYKCADSDKCCFDRCLEEHVC	42	1		CRYYCRTPEDVAYCC	15	1	0.00909091	0.927273	1	0.00429185	0.965665
	73	15	16	42									CARYCPGSAPGSYVCC	16	1	0.00909091	0.945455		ESKYEPEAPVGTKILD	16	1		CPPVRPTCPQTRFGPPQTCSNDYNCAGSDKCCFDRCLGEHVC	42	1		CRRWCRTPERAAYCC	15	1	0.00909091	0.936364	1	0.00429185	0.969957
	73	15	16	42									CKYYCPGPYADQYACC	16	1	0.00909091	0.954545		ESAHEPETPVGTKPLD	16	2		CPPVRPTCPQTRFGPPQTCSNDYNCAGRDKCCFDRCLGEHVC	42	1		CDIPCTNRFGKEKCC	15	1	0.00909091	0.945455	1	0.00429185	0.974249
	73	15	16	42									CSRWCPGSTPGLFVCC	16	1	0.00909091	0.963636		ETDLEPEGPVGTKPLD	16	2		CPPVRPTCPHTRFGPPQTCSNDYNCAGRDKCCFDRCLGEHVC	42	1		CNYCRTPVGYVCC	13	1	0.00909091	0.954545	1	0.00429185	0.978541
	73	15	16	42									CENYCEIEGQNNQYECC	17	1	0.00909091	0.972727		EDKNEPEIPVGTKPLD	16	2		CPRVRPTCPRFQGGGPVTCSNDYKCAGIDKCCFDTCLQEHVC	42	1		CRRWCRTPEQQTYCC	15	1	0.00909091	0.963636	1	0.00429185	0.982833
	73	15	16	42									CEDYCKIEGQNNQYECC	17	1	0.00909091	0.981818		ERSHEPEGPVGTKPLD	16	2		CPAVRPTCPHTRFGPPQTCSNDYNCAGRDKCCFDRCLGEHVC	42	1		CRFWCRTPHGQAYCC	15	1	0.00909091	0.972727	1	0.00429185	0.987124
	73	15	16	42									CEDYCEIEGQNNQYECC	17	1	0.00909091	0.990909		EGAQQPQRPVGTKFGR	16	2		CPPVRPTCPNTRFGPPQTCSNDYNCAGSDKCCFDRCLGEHVC	42	2		CRRWCETPENSFYCC	15	1	0.00909091	0.981818	1	0.00429185	0.991416
	73	15	16	42									CEDYCEIEERPNHYECC	17	1	0.00909091	1		ETNLEPEGPVGTKPLG	16	2		CPQVRPTCPNVRSGPPKTCSNDYKCAGSDKCCFDRCLEEHVC	42	2		CRYWCKTLEGQAYCC	15	1	0.00909091	0.990909	1	0.00429185	0.995708
	73	15	16	42											110				ETAFEPEAPVGTKPLD	16	2		CPQVRPTCPNVRSGPPKTCSNDYKCAGFDKCCFDRCLEEHVC	42	2		CRYWCKTPEDQAYCC	15	1	0.00909091	1	1	0.00429185	1
	73	15	16	42															ETIFEPEAPVGTKPLD	16	3		CPQVRPTCPNVRSGPPKTCSNDYKCAGLDKCCFDRCLEEHVC	42	3		Total	5	110			233
	73	15	16	42															ETAFEPEAPVGTKPLN	16	3		CPPVRPVCPLRSFQPPFTCSNDGACGGIDKCCFDRCLGEHVC	42	4
	73	15	16	42															ETVFEPEAPVGTKPLD	16	4		CPDVRPTCPQSIRSGGPVRCSNDYKCANFDKCCYDRCLKEHVC	43	1
	73	15	16	42															ETVHEPETPVGTKPLN	16	4		CPPVRPQCPPVRTFRPPSTCSSDSSCGGSDKCCYDTCLRHHTC	43	1
	73	15	16	42															ETVYEPETPVGTKPLD	16	5		CPPVRPQCPPVRSGYAPPRCSRDSNCPGYEKCCFDACLEYRTC	43	1
	73	15	15	43															ETVHEPETPVGTKPLD	16	11		CPPVRPTCPSVRSDLPPTPCTNDAYCPGTDKCCYDVCLEHRTC	43	1
	73	15	16	42															EGGGSNNGHYPVVKPGR	17	1		CPQVRPTCPPTRFGGGPVTCSSDFKCGGLDKCCFDRCLGEHVC	43	1
	74	15	16	43															DNDGETVTAEEPEHDGE	17	1		CPVVRPTCPHHTRFGPPRTCSSDFGCAGRDKCCYDRCLQEHVC	43	1
	74	15	16	43															DNDGETFDPEELEHDGQ	17	1		CPPVRPTCPQSTRFGPPQTCSNDYNCGGNDKCCYDRCLQEHVC	43	1
	74	15	15	44															ESIDQPQSAAGVVKPGF	17	1		CPQVRPTCPPTRFGGAPVTCSSDFKCGGLDKCCFDRCLGEHVC	43	1
	74	15	16	43															ENINQPQSAAGVVKPGF	17	1		CPQVRPTCPPTRFGGRPVTCSSDYKCGGLDKCCFDRCLGEHVC	43	1
	74	15	16	43															ENINQPQSTAGVVKPGF	17	1		CPDVRPTCPVGLRSQRPILCSNDYKCFGADKCCFDRCLEEHVC	43	1
	74	15	16	43															ENISQPQSAAGVVKPGF	17	1		CPDVRPTCPQSIRAGGPVRCSNDYKCANLDKCCYDRCLKEHVC	43	1
	74	15	15	44															ENVNQPHSIPGVVKPGQ	17	1		CPIVRPTCPVGLRSQRPILCSNDYKCFGADKCCFDRCLQEHVC	43	1
	74	15	10	49															DDGTVSDPPPEAEHSGE	17	2		CPDVRPTCPQSIRAGGPVRCSNDYKCANFDKCCYDRCLKEHVC	43	1
	74	15	16	43															GRDVSQGQGNYPVVRSGS	18	1		CPIVRPTCPVSVRGLRPITCSNDYRCGGVDKCCYDRCLQEHVC	43	1
	74	15	16	43															DRGNNQGQGNYPGSKPGF	18	2		CPVVRPTCPFNVRGLRPITCSNDYRCGGADKCCFDRCLQEHVC	43	1
	74	15	16	43																	110		CPPVRPFCPPVRSFGPPITCSSDGSCGGVDKCCFDTCLQEHTC	43	1
	74	15	16	43																			CPLVRPTCPVSVRGLRPITCSNDYKCGGVDKCCFDRCLQEHVC	43	2
	74	15	16	43																			CPQVRPTCPPTRFGGQPVTCSSDYKCGGLDKCCFDRCLGEHVC	43	3
	74	15	16	43																			CPPVRPQCPPVRSGYRPPNQCSNDSKCPGYEKCCYDTCLKHHTC	44	1
	74	15	16	43																			CPPVRPQCPPVRSGFRPPNQCSNDSRCPGHEKCCYDTCLEHHTC	44	1
	74	15	16	43																			CPPTRPTCTDPFYYSGPPQRCENSYECMSSSLCCYDTCLQHKTC	44	1
	74	15	16	43																			CPKVRSFCPRIEGGSRRPDVCPHDGACQPYEKCCFDTCLDHHTC	44	1
	74	15	17	42																			CPLVRPTCPETRFQVQPPINCSNDFKCAGFDKCCYDRCLKQHVC	44	1
	74	15	17	42																			CPRVRDTCPPVRFGGLAPVTCSSDFKCGGIDKCCFDRCLGEHVC	44	1
	74	15	17	42																			CPEVRSFCPRIEGGSRRPDVCPHDGACQPYEKCCFDTCLDHHTC	44	1
	74	15	16	43																			CPEVRPTCTDPYHYSGPPRPCESSQECMSGSLCCFDMCLRQKTC	44	1
	74	15	17	42																			CPRVRDTCPPVRFGGLAPVTCSSDYKCGGIDKCCFDRCLGEHVC	44	1
	74	15	16	43																			CPRVRDTCPPVRFGGQPPVTCSSDYKCGGLDKCCFDRCLGEHVC	44	1
	75	15	16	44																			CPQVRPTCPPVRFQPQAPVTCSSDYKCGGIDKCCFDRCLKEHVC	44	1
	75	15	17	43																			CPQVRPSCPPVRFGGQAPVTCSSDYKCGGVDKCCFDRCLGEHVC	44	1
	75	15	16	44																			CPQVRPSCPPVRFGAQAPVTCSSDYKCGGVDKCCFDRCLGEHVC	44	1
	75	15	16	44																			CPRVRDTCPPVRFGGQAPVTCSSDYKCGGLDKCCFDRCLGEHVC	44	1
	75	15	16	44																			CPAVRDVCPPTRFGVGRPIQCAHDGQCYGTSDKCCFDRCLGEHVC	45	1
	75	15	16	44																			CPKVRDTCPPVRFLAVEQPVPCSSDYKCGGLDKCCFDRCLGQHVC	45	1
	75	15	16	44																			CPAVRDVCPPTRFGVGRPIQCAHDGQCYASNDKCCFDRCLGEHVC	45	1
	75	15	16	44																			CPLVRPTCPPVRFLQQQGPVPCSSDFKCGGLDKCCFDRCLKEHVC	45	1
	75	15	16	44																			CPRVRDICPPVRFLQEQGPVPCSSDFRCGGLDKCCFDRCLEQHVC	45	1
	75	15	16	44																			CPAVRASCPPTHLGGSQPNACAHDGQCLSPADKCCFDVCLGHQVC	45	1
	75	15	16	44																			CPKIRDTCPPVRFLEEQGPVPCSSDYKCGGLDKCCFDRCLGRHVC	45	1
	75	15	17	43																			CPPMPRVLIDCSDKNLFEKEVQVQTCTSDSNCKSDEKCCRDVCDPKLIC	49	1
	76	15	16	45																			CPQVRSECPGIYKNLPGTLPDFDVYGLPYPDDPKICAHDSVCSAWEKCCFDRCFERHVC	59	1
	76	15	16	45																			CPQVRRECPGKYKNLPSILPDFDDNGVPYPDNPKFCAHDSACNAWEKCCYDHCFERHVC	59	1
	76	15	16	45
	76	15	16	45
	78	15	18	45
	78	15	18	45
	78	15	18	45
	91	15	17	59
	91	15	17	59
	65	16	8	41
	69	16	9	44
	69	16	9	44
	63	17	6	40
	64	17	6	41
	64	17	6	41
	65	17	6	42
	78	20	17	41
	78	20	17	41
averag	71.6	15	14	42.6
stdesv	6	1	4.4	2.7
varian	36.2	1.1	19.1	7.1
pc_var	8.4	6.9	31.2	6.2
lowval	58	13	4	40
higval	91	20	18	59
																							CNYCRTRYGYVCC
																							CNYCITRYGYVCC
																							CNYCRTPVGYVCC
