# Supplementary material for: Where are the Penaeids crustins?
Source: PeerJ. 2023 Jul 20;11:e15596. doi: 10.7717/peerj.15596 (PMC10363340; doi:10.7717/peerj.15596)
Supplement: Table S7 — The corresponding alignments are also presented, where the high level of conservation of the crustin signatures can be appreciated. [file peerj-11-15596-s007.xlsx]

## Sheet: Sheet1
CLUSTAL O(1.2.4) multiple sequence alignment				CLUSTAL O(1.2.4) multiple sequence alignment		CLUSTAL O(1.2.4) multiple sequence alignment
124_PENJA CRYWCKTPEGQAYCC ETVYEPETPVGT-KPLDCPQVRPTCPN-VRSGPPKTCSNDYKCAGADKCCFDRCLEEHVC				171_PENVA CRYWCRTPEGQAYCCESIDQPQSAAGVVKPGFCPPVRPVCPL-RSFQPPFTCSNDGACGGIDKCCFDRCLGEHVC		058_PENPE CNYCRTRYGYVCCKPGRCPPVRDTCPGIRNRPPICRQDTDCFGSDKCCYDVCLRDSVC
122_PENJA CRYWCKTPEGQAYCC ETVYEPETPVGT-KPLNCPQVRPTCPN-VRSGPPKTCSNDYKCAGSDKCCFDRCLEEHVC				176_PENCH CRYWCRTPEGQAYCCENINQPQSAAGVVKPGFCPPVRPVCPL-RSFQPPFTCSNDGACGGIDKCCFDRCLGEHVC		077_PENIN CNYCRTRYGYVCCKPGRCPPVRDTCPGIRNRPPICRQDTECFGSDKCCYDTCLNDTVC
121_PENJA CRYWCKTPEGQAYCC ETVYEPETPVGT-KPLDCPQVRPTCPN-VRSGPPKTCSNDYKCAGSDKCCFDRCLEEHVC				176_PENMO CRYWCRTPEGQAYCCENINQPQSAAGVVKPGFCPPVRPVCPL-RSFQPPFTCSNDGACGGIDKCCFDRCLGEHVC		048_PENMN CNYCITRYGYVCCKPGRCPPVRDTCPGIRNRPPICRQDTECFGSDKCCYDTCLNDTVC
127_PENJA CRYWCKTPEGQAYCC ETVYEPETPVGT-KPLDCPQVRPTCPN-VRSGPPKTCSNDYKCADSDKCCFDRCLEEHVC				176_PENVA CRYWCRTPEGQAYCCENINQPQSAAGVVKPGFCPPVRPVCPL-RSFQPPFTCSNDGACGGIDKCCFDRCLGEHVC		110_PENCH CNYCRTRYGYVCCKPGRCPPVRDVCPGLRQGVPICRQDTDCFGSDKCCYDVCLNDTVC
125_PENJA CRYWCKTPEGQAYCC ETVYEPETPVGT-KPLDCPQVRPTCPN-VRSGPPKTCSNDYKCAGFDKCCFDRCLEEHVC				180_PENJA CRYWCRTPEGQAYCCENISQPQSAAGVVKPGFCPPVRPVCPL-RSFQPPFTCSNDGACGGIDKCCFDRCLGEHVC		096_PENMO CNYCRTRYGYVCCKLGRCPQIREICPGLKKGISICRQDNECFGSDKCCFDICLNDTVC
130_PENJA CRYWCKTPEGQAYCC ETVHEPETPVGT-KPLDCPQVRPTCPN-VRSGPPKTCSNDYKCAGFDKCCFDRCLEEHVC				177_PENVA CRYWCRTPEGQAYCCENINQPQSTAGVVKPGFCPPVRPVCPL-RSFQPPFTCSNDGACGGIDKCCFDRCLGEHVC		095_PENMO CNYCRTRYGYVCCKPGRCPQIRDTCPGLRKGVPICRQDTDCFGSDKCCFDTCLNDTVC
129_PENJA CRYWCKTPEGQAYCC ETVYEPETPVGT-KPLVCPQVRPTCPN-VRSGPPKTCSNDYKCAGLDKCCFDRCLEEHVC				156_PENCH CRYWCRTPEGQAYCCETAYEPERPVGT-KLLECPDVRPTCPQSIRAGGPVRCSNDYKCANLDKCCYDRCLKEHVC		094_PENMO CNYCRTRYGYVCCKPGRCPQIRETCPGLRKGIPICRQDTDCFGSDKCCFDTCLNDTVC
128_PENJA CRYWCKTPEGQAYCC ETVYEPETPVGT-KPLDCPQVRPTCPN-VRSGPPKTCSNDYKCAGLDKCCFDRCLEEHVC				023_PENVA CRYWCRTPEGQAYCCEGAQQPERPVGT-KFGLCPPVRPTCPN-TRFGPPQTCSNDYNCAGSDKCCFDRCLGEHVC		099_PENMO CNYCRTRYGYVCCKPGRCPQIRETCPGLRKGIPICRQDNECFGSDKCCFDTCLSDTVC
126_PENJA CRYWCKTPEGQAYCC ETVHEPETPVGT-KPLDCPQVRPTCPN-VRSGPPKTCSNDYKCAGLDKCCFDRCLEEHVC				141_PENVA CRYWCRTPEGQAYCCEGAQQPQRPVGT-KFGLCPPVRPTCPN-TRFGPPQTCSNDYNCAGSDKCCFDRCLGEHVC		098_PENMO CNYCRTRYGYVCCKPGRCPQIRETCPGLRKGIPICRQDNECFGSDKCCFNTCLNDTVC
144_PENMO CRYWCKTPEGQAYCC ETVHEPETPVGT-KPLDCPQIRPTCPR-F-HGPPSTCSNDYKCAGLDKCCFDRCLGEHVC				151_PENCH CRYWCRTPEGQAYCCEGAQQPQRPVGT-KFGQCPPVRPTCPQ-TRFGPPQTCSNDYNCAGRDKCCFDRCLGEHVC		091_PENMO CNYCRTRYGYVCCKPGRCPQIRETCPGLRKGIPICRQDNECFGSDKCCFDTCLNDTVC
136_PENCH CRYWCKTPEGQAYCC ETVHEPETPVGT-KPLDCPQIRPTCPR-F-HGPPTTCSNDYRCAGLDKCCFDRCLGEHVC				134_PENCH CRYWCRTPEGQAYCCEGAQQPERPVGT-KFGQCPPVRPTCPQ-TRFGPPQTCSNDYNCAGSDKCCFDRCLGEHVC		097_PENMO CNYCRTRYGYVCCKPGRCPQVRETCPGLRKGIPICRQDNECFGSDKCCFDTCLNDTVC
149_PENCH CRYWCKTPEGQAYCC ETVHEPETPVGT-KPLDCPQIRPTCPR-F-HGPPTTCSNDYKCAGLDKCCFDRCLGEHVC				203_PENMO CRYWCRTPEGQAYCCEGAQQPQRPVGT-KFGRCPAVRPTCPH-TRFGPPQTCSNDYNCAGRDKCCFDRCLGEHVC		**** ********* **** :*: ***::: *****.:********:: ** *:**
142_PENCH CRYWCKTPEGQAYCC ETVHEPETPVGT-KPLNCPQVRPTCPR-F-HGPPTTCSSDYKCAGLDKCCFDRCLEEHVC				153_PENMO CRYWCRTPEGQAYCCEGAQQPQRPVGT-KFGRCPPVRPTCPH-TRFGPPQTCSNDYNCAGRDKCCFDRCLGEHVC
154_PENMO CRYWCKTPEGQAYCC ETVHEPETPVGT-KPLDCPQVRPTCPR-F-HGPPNTCSNDYKCADLDKCCFDRCLGEHVC
139_PENMO CRYWCKTPEGQAYCC ETVHEPETPVGT-KPLDCPQVRPTCPR-F-HGPPNTCSNDYKCAGLDKCCFDRCLGEHVC						*****************************************
143_PENMO CRYWCKTPEGQAYCC ETVHEPETPVGT-KPLDCPQVRPTCPR-F-HGPPNTCSNDFKCAGLDKCCFDRCLGEHVC				****************************************		077_PENIN CNYCRTRYGYVCCKPGRCPPVRDTCPGIRNRPPICRQDTECFGSDKCCYDTCLNDTVC
135_PENMO CRYWCKTPEGQAYCC ETVHEPETPVGT-KPLNCPQVRPTCPR-F-HGPPNTCSNDYKCAGLDKCCFDRCLGEHVC				176_PENCH CRYWCRTPEGQAYCCENINQPQSAAGVVKPGFCPPVRPVCPLRSFQPPFTCSNDGACGGIDKCCFDRCLGEHVC		048_PENMN ....I.....................................................
132_PENVA CRYWCKTPEGQAYCC ETVHEPETPVGT-KPLDCPQVRPTCPR-F-HGPPTTCSNDYKCAGLDKCCFDRCLGEHVC				176_PENMO ..........................................................................		058_PENPE .......................................D..........V..R.S..
132_PENMO CRYWCKTPEGQAYCC ETVHEPETPVGT-KPLDCPQVRPTCPR-F-HGPPTTCSNDYKCAGLDKCCFDRCLGEHVC				176_PENVA ..........................................................................		110_PENCH .......................V...L.QGV.......D..........V.......
132_PENCH CRYWCKTPEGQAYCC ETVHEPETPVGT-KPLDCPQVRPTCPR-F-HGPPTTCSNDYKCAGLDKCCFDRCLGEHVC				177_PENVA .......................T..................................................
140_PENCH CRYWCKTPEGQAYCC ETVHEPETPVGT-KPLTCPQVRPTCPR-F-HGPPTTCSNDYKCAGLDKCCFDRCLGEHVC				171_PENVA ................S.D.......................................................		091_PENMO CNYCRTRYGYVCCKPGRCPQIRETCPGLRKGIPICRQDNECFGSDKCCFDTCLNDTVC
146_PENCH CRYWCKTPEGQAYCC ETVHEPETPVGT-KPLDCPQVRPTCPR-F-HGPPTTCSNDYKCAGIDKCCFDRCLGEHVC				180_PENJA ..................S.......................................................		096_PENMO ..............L........I....K...S.................I.......
152_PENMO CRYWCKTPEGQAYCC ETVHEPETPVGT-KPLNCPQVRPTCPR-F-HGPPITCSNDYKCAGLDKCCFDRCLGEHVC						095_PENMO ......................D........V......TD..................
137_PENCH CRYWCKTPEGQAYCC ETVHEPETPVGT-KPLNCPQVRPTCPR-F-HGPPTTCSNDYKCAGLDKCCFDRCLGEHVC				156_PENCH CRYWCRTPEGQAYCCETAYEPERPVGTKLLECPDVRPTCPQSIRAGGPVRCSNDYKCANLDKCCYDRCLKEHVC		094_PENMO ......................................TD..................
137_PENMO CRYWCKTPEGQAYCC ETVHEPETPVGT-KPLNCPQVRPTCPR-F-HGPPTTCSNDYKCAGLDKCCFDRCLGEHVC						099_PENMO .....................................................S....
011_PENBR CRYWCKTPEGQAYCC ESAHEPETPVGT-KPLNCPQVRPTCPR-F-HGPPKPCSNDYKCAGLDKCCFDRCLEEHVC				153_PENMO CRYWCRTPEGQAYCCEGAQQPQRPVGTKFGRCPPVRPTCPHTRFGPPQTCSNDYNCAGRDKCCFDRCLGEHVC		098_PENMO .................................................N........
138_PENVA CRYWCKTPEGQAYCC ESAHEPETPVGT-KILDCPQVRPTCPR-F-HGPPTTCSNDYKCAGLDKCCFDRCLGEHVC				203_PENMO .................................A.......................................		097_PENMO ....................V.....................................
108_PENSE CRYWCKTPEGQAYCC ESAHEPETPVGT-KPLDCPQVRPTCPR-F-HGPPTTCSNDYKCAGLDKCCFDRCLGEHVC				151_PENCH ..............................Q.........Q................................
108_PENVA CRYWCKTPEGQAYCC ESAHEPETPVGT-KPLDCPQVRPTCPR-F-HGPPTTCSNDYKCAGLDKCCFDRCLGEHVC				134_PENCH .....................E........Q.........Q.................S..............
008_PENSU CRYWCKTPEGQAYCC ESAHEPETPVGT-KPLDCPQVRPTCPR-F-SGPPTTCSNDYKCAGLDKCCFDRCLGEHVC				023_PENVA .....................E........L.........N.................S..............
008_PENPA CRYWCKTPEGQAYCC ESAHEPETPVGT-KPLDCPQVRPTCPR-F-SGPPTTCSNDYKCAGLDKCCFDRCLGEHVC				141_PENVA ..............................L.........N.................S..............
012_PENSC CRYWCKTPEGQAYCC ESAHEPETPVGT-KLLDCPQVRPTCPR-F-HGPPTTCSNDYKCAGLDKCCFDRCLGEHVC
016_PENVA CRYWCKTPEGQAYCC ETTLEPERPVGT-KFLECPDVRPTCPQSIRSGGPVRCSNDYKCANFDKCCYDRCLKEHVC
***********************************
124_PENJA CRYWCKTPEGQAYCCETVYEPETPVGTKPLDCPQVRPTCPNVRSGPPKTCSNDYKCAGADKCCFDRCLEEHVC
122_PENJA ..............................N...........................S..............
121_PENJA ..........................................................S..............
127_PENJA .........................................................DS..............
125_PENJA ..........................................................F..............
130_PENJA ..................H.......................................F..............		Maximum Parsimony analysis of taxa The evolutionary history was inferred using the Maximum Parsimony method. The bootstrap consensus tree inferred from 1000 replicates is taken to represent the evolutionary history of the taxa analyzed [1]. Branches corresponding to partitions reproduced in less than 50% bootstrap replicates are collapsed. The percentage of replicate trees in which the associated…
129_PENJA ..............................V...........................L..............
128_PENJA ..........................................................L..............
126_PENJA ..................H.......................................L..............
132_PENMO CRYWCKTPEGQAYCCETVHEPETPVGTKPLDCPQVRPTCPRFHGPPTTCSNDYKCAGLDKCCFDRCLGEHVC
132_PENVA ........................................................................
132_PENCH ........................................................................
137_PENCH ..............................N.........................................
137_PENMO ..............................N.........................................
144_PENMO ..................................I...........S.........................
154_PENMO ..............................................N.........D...............
139_PENMO ..............................................N.........................
143_PENMO ..............................................N.....F...................
135_PENMO ..............................N...............N.........................
152_PENMO ..............................N...............I.........................
136_PENCH ..................................I..................R..................
149_PENCH ..................................I.....................................
142_PENCH ..............................N...................S................E....
140_PENCH ..............................T.........................................
146_PENCH .........................................................I..............
108_PENSE CRYWCKTPEGQAYCCESAHEPETPVGTKPLDCPQVRPTCPRFHGPPTTCSNDYKCAGLDKCCFDRCLGEHVC
108_PENVA ........................................................................
008_PENSU ..........................................S.............................
008_PENPA ..........................................S.............................
011_PENBR ..............................N...............KP...................E....
138_PENVA ............................I...........................................
012_PENSC ............................L...........................................
016_PENVA CRYWCKTPEGQAYCCETTLEPERPVGTKFLECPDVRPTCPQSIRSGGPVRCSNDYKCANFDKCCYDRCLKEHVC
