# Supplementary material for: Where are the Penaeids crustins?
Source: PeerJ. 2023 Jul 20;11:e15596. doi: 10.7717/peerj.15596 (PMC10363340; doi:10.7717/peerj.15596)
Supplement: Table S8 [file peerj-11-15596-s008.xlsx]

## Sheet: Sheet1
		Distances between signatures						Standard error in blue
		183	171	180	176	177	074	204	163	158	145	032	118	133	119	120	159	059	111	164	160	168	165	166	035	036	153	203	151	134	023	141	155	161	181	188	024	178	037	016	156	170	100	174	049	050	129	126	128
	183		0.090493	0.0884264	0.0872359	0.0840367	0.203385	0.233772	0.199907	0.145798	0.150138	0.154532	0.150474	0.150808	0.153296	0.153658	0.173913	0.199132	0.187061	0.154166	0.175011	0.177528	0.158276	0.153732	0.145344	0.138627	0.134427	0.13689	0.130361	0.134739	0.145262	0.13888	0.203183	0.201426	0.183561	0.175389	0.178073	0.185122	0.179976	0.185711	0.177855	0.187529	0.153308	0.155481	0.171416	0.177903	0.150069	0.145066	0.148152
	171	0.375972		0.0227301	0.0214725	0.0262863	0.175677	0.198177	0.180964	0.117901	0.128611	0.133745	0.129617	0.130025	0.132959	0.131595	0.154232	0.165584	0.156083	0.134703	0.143231	0.145369	0.133643	0.130045	0.128052	0.111691	0.108064	0.111067	0.108955	0.112889	0.106749	0.102904	0.160858	0.164093	0.147794	0.143996	0.140648	0.148387	0.141024	0.170626	0.166712	0.175563	0.148348	0.150332	0.139399	0.14535	0.111544	0.115706	0.116336
	180	0.354823	0.0313012		0.0148207	0.0212068	0.175536	0.197881	0.171633	0.112016	0.122715	0.127875	0.123749	0.124167	0.127058	0.125743	0.148445	0.158569	0.149333	0.129179	0.137239	0.139443	0.128031	0.124526	0.129889	0.108074	0.108774	0.111859	0.109678	0.113674	0.107433	0.103521	0.157101	0.160394	0.148382	0.140597	0.137269	0.145223	0.13529	0.166803	0.167918	0.176804	0.150573	0.152547	0.134825	0.140691	0.112488	0.117355	0.117299
	176	0.334699	0.0305998	0.0152168		0.0149697	0.174899	0.197069	0.17309	0.117302	0.127886	0.132993	0.128887	0.129293	0.132145	0.130829	0.153237	0.164391	0.155031	0.133978	0.14243	0.144527	0.132892	0.129348	0.1266	0.111622	0.108618	0.111687	0.109519	0.113493	0.107273	0.103382	0.16027	0.163513	0.150262	0.143537	0.140178	0.147987	0.140258	0.169972	0.16749	0.176295	0.147455	0.149408	0.133677	0.139548	0.112472	0.114447	0.117257
	177	0.324695	0.0461342	0.030588	0.0152419		0.176366	0.19866	0.174572	0.118325	0.128953	0.134108	0.129976	0.130381	0.133212	0.131882	0.154487	0.165899	0.156498	0.135102	0.143737	0.145857	0.134066	0.130458	0.127543	0.112511	0.109698	0.112778	0.110596	0.114538	0.108274	0.1044	0.161652	0.164894	0.151521	0.144805	0.141424	0.149232	0.141499	0.171393	0.168884	0.17777	0.148655	0.150619	0.13476	0.140687	0.113473	0.115452	0.118287
	074	1.00339	0.810465	0.839326	0.839275	0.843905		0.043297	0.0756215	0.087409	0.0883175	0.104132	0.101971	0.0944379	0.0922691	0.0912083	0.0973819	0.0732209	0.0796814	0.0979477	0.083816	0.0849442	0.099895	0.0971638	0.173685	0.180043	0.174191	0.172553	0.169314	0.164631	0.174764	0.178842	0.142079	0.145044	0.148089	0.150767	0.141948	0.146191	0.13362	0.148286	0.134568	0.130698	0.132386	0.131292	0.127523	0.116381	0.133993	0.128884	0.12661
	204	1.13437	0.878086	0.908071	0.9078	0.91279	0.111007		0.0681051	0.100856	0.098037	0.107169	0.110082	0.111445	0.109096	0.107572	0.088752	0.0765958	0.0818418	0.0989378	0.08939	0.0863347	0.100643	0.100228	0.197869	0.20346	0.198369	0.196769	0.19309	0.18814	0.198727	0.203055	0.141462	0.144425	0.144615	0.147405	0.138831	0.142715	0.144399	0.149914	0.139044	0.13445	0.134599	0.133482	0.132682	0.121429	0.149194	0.14366	0.141588
	163	0.953286	0.842731	0.81077	0.819814	0.824366	0.293585	0.265823		0.110267	0.107604	0.107415	0.10963	0.11647	0.114249	0.118517	0.0803224	0.0984677	0.103074	0.0999887	0.0885107	0.0853155	0.107716	0.102885	0.183052	0.176917	0.185759	0.186599	0.184327	0.179499	0.188106	0.192296	0.140665	0.139176	0.134738	0.135625	0.126621	0.130952	0.130458	0.152807	0.146044	0.151281	0.118173	0.115577	0.129449	0.117923	0.149214	0.13685	0.142057
	158	0.603281	0.480095	0.465802	0.480831	0.483751	0.296288	0.339688	0.438492		0.031278	0.0496965	0.0471119	0.0437233	0.0468613	0.0436196	0.074356	0.0779218	0.0754593	0.0561897	0.0670311	0.0704051	0.0608471	0.0577798	0.121153	0.120357	0.126943	0.129063	0.124184	0.119393	0.12257	0.12609	0.0879367	0.0928443	0.0882419	0.0846352	0.0771664	0.0873052	0.0870301	0.100434	0.10081	0.0971422	0.0868041	0.0893137	0.0866529	0.0843092	0.0712863	0.0677719	0.065429
	145	0.675796	0.541035	0.525599	0.541677	0.544914	0.29605	0.331507	0.42734	0.0495422		0.0357819	0.036386	0.031566	0.0350928	0.0314067	0.0725573	0.0768511	0.0742683	0.0642402	0.0639689	0.0642878	0.0623731	0.0594278	0.128949	0.124174	0.130702	0.132887	0.127302	0.123132	0.131843	0.135442	0.0988159	0.103685	0.0948073	0.0895459	0.0829658	0.0920244	0.09512	0.097002	0.095448	0.0938112	0.0945972	0.0971126	0.0887693	0.0864124	0.0773677	0.0747392	0.0723427
	032	0.641765	0.553423	0.537702	0.554048	0.55736	0.36231	0.371819	0.410671	0.121633	0.0795201		0.0156187	0.0237442	0.0284835	0.0331544	0.0545816	0.071894	0.0706301	0.0559361	0.0581536	0.0553506	0.0537602	0.0509638	0.12578	0.130807	0.133978	0.136221	0.130564	0.126015	0.134886	0.138878	0.115558	0.120822	0.102632	0.0983209	0.0903196	0.0996014	0.0925686	0.102833	0.0932014	0.0937837	0.0983477	0.101514	0.0929859	0.0921406	0.0846291	0.0818872	0.0794294
	118	0.62802	0.541264	0.525889	0.541903	0.545126	0.357442	0.393432	0.432661	0.118524	0.0801244	0.0154687		0.0227892	0.0274283	0.0319921	0.0586735	0.0672974	0.0660013	0.0508875	0.0553568	0.0513252	0.0495304	0.0467937	0.121851	0.127097	0.130123	0.132318	0.126748	0.122393	0.131183	0.134998	0.117198	0.122515	0.104173	0.0999418	0.0917441	0.101079	0.0892899	0.104977	0.0952588	0.0959849	0.100269	0.103234	0.089696	0.0888402	0.0816075	0.0787952	0.0763704
	133	0.62918	0.54235	0.526955	0.542988	0.546217	0.310019	0.379793	0.46472	0.101299	0.0633669	0.0317397	0.0312304		0.0153054	0.0218157	0.0650873	0.0757005	0.0688596	0.0538214	0.0517801	0.0525745	0.0520781	0.048838	0.125128	0.124287	0.127038	0.129134	0.12376	0.119391	0.128058	0.131866	0.112093	0.117233	0.0991838	0.0944021	0.0866807	0.096051	0.092423	0.105609	0.0951236	0.0964862	0.101663	0.104535	0.0927299	0.0918304	0.0780998	0.0755438	0.0731198
	119	0.656966	0.568512	0.552704	0.569107	0.572457	0.305566	0.374542	0.458819	0.118796	0.0796129	0.0478361	0.0470827	0.0154201		0.0159366	0.0619189	0.0722899	0.0726231	0.050709	0.0479531	0.0486771	0.0537172	0.0455835	0.127722	0.126672	0.12981	0.132056	0.126441	0.121891	0.130589	0.13458	0.11504	0.120296	0.0971007	0.0919413	0.0845381	0.0939135	0.0948369	0.107894	0.0973667	0.0987437	0.103625	0.106624	0.0945495	0.089633	0.0803249	0.0778396	0.0753932
	120	0.680203	0.544839	0.529299	0.545477	0.54874	0.303288	0.371174	0.472428	0.101451	0.0634463	0.0639393	0.0629534	0.0309266	0.0153921		0.0662723	0.0711948	0.0723242	0.0550081	0.0521123	0.0528951	0.0581357	0.0499159	0.131912	0.127361	0.13425	0.136538	0.130783	0.126417	0.135161	0.138964	0.112027	0.117305	0.0996513	0.0943958	0.0869912	0.0962483	0.0952986	0.105991	0.10157	0.102957	0.103519	0.106548	0.0929148	0.0880418	0.0816211	0.0790682	0.0765472
	159	0.78778	0.679019	0.661607	0.679439	0.683278	0.346366	0.316732	0.282372	0.231716	0.226709	0.141915	0.159815	0.181935	0.163148	0.170184		0.0829629	0.0856448	0.0435136	0.0637126	0.0607849	0.0667265	0.058449	0.145728	0.160871	0.165969	0.169179	0.161791	0.157394	0.166968	0.170837	0.111595	0.105558	0.105163	0.0998143	0.0926583	0.0995897	0.0954849	0.114639	0.104386	0.104785	0.109414	0.110528	0.11157	0.105962	0.108244	0.105289	0.102595
	059	0.882732	0.692857	0.674444	0.693274	0.697356	0.250186	0.286719	0.401681	0.249442	0.24456	0.206586	0.18573	0.227407	0.207774	0.20607	0.251656		0.0304899	0.0699066	0.0535575	0.0498142	0.063866	0.0638999	0.165491	0.174389	0.173409	0.174138	0.168748	0.163375	0.173486	0.177422	0.136202	0.136881	0.11827	0.111536	0.104026	0.109864	0.124757	0.136652	0.132002	0.126869	0.126324	0.123037	0.12877	0.123321	0.128587	0.12522	0.121926
	111	0.832363	0.652586	0.635004	0.653061	0.656906	0.261976	0.283663	0.430542	0.216663	0.21234	0.205984	0.185257	0.1885	0.208111	0.207402	0.287097	0.0605319		0.0672964	0.0519559	0.0485112	0.0574482	0.0618771	0.155168	0.160595	0.155694	0.156322	0.151614	0.146995	0.156271	0.159876	0.12902	0.129698	0.117356	0.110615	0.102836	0.108777	0.125197	0.123256	0.11872	0.120839	0.111874	0.10879	0.128759	0.130946	0.117416	0.114751	0.111603
	164	0.691771	0.568758	0.553154	0.569345	0.572652	0.362445	0.36828	0.398378	0.160724	0.184159	0.154902	0.13614	0.138372	0.120602	0.126132	0.110701	0.201809	0.199032		0.0533234	0.049294	0.0491906	0.0403277	0.136531	0.137266	0.145781	0.148051	0.142093	0.137887	0.146766	0.150169	0.105686	0.107693	0.0987761	0.089766	0.0832279	0.0927847	0.0906833	0.108076	0.100078	0.0998081	0.0928562	0.0952408	0.107444	0.102166	0.0907381	0.0885201	0.085953
	160	0.741163	0.583682	0.567652	0.584252	0.587669	0.303597	0.318344	0.314375	0.188142	0.181702	0.1571	0.153248	0.135871	0.118382	0.123756	0.162482	0.151588	0.149632	0.136766		0.0152759	0.0452671	0.0404136	0.149795	0.155496	0.150369	0.151008	0.148783	0.144182	0.152636	0.156629	0.120144	0.120549	0.106484	0.102474	0.0943966	0.100327	0.103549	0.134824	0.124144	0.125302	0.117593	0.115205	0.11908	0.113282	0.10159	0.0984079	0.0956818
	168	0.769531	0.609116	0.592725	0.609645	0.613172	0.305901	0.31105	0.30712	0.207326	0.182176	0.153226	0.134629	0.136819	0.119205	0.124643	0.158392	0.133234	0.13153	0.118352	0.0151237		0.0406911	0.0358898	0.153124	0.158557	0.152865	0.153506	0.151338	0.146526	0.154957	0.159147	0.120661	0.121077	0.106952	0.102971	0.0948364	0.100775	0.105928	0.130608	0.120182	0.121256	0.113694	0.111275	0.120833	0.114965	0.103632	0.100534	0.0978588
	165	0.693288	0.586772	0.57115	0.587321	0.590654	0.383309	0.388934	0.418213	0.180598	0.195494	0.166472	0.148093	0.15045	0.152699	0.15907	0.210739	0.209394	0.186056	0.132677	0.114067	0.0966488		0.0271245	0.142864	0.138368	0.140924	0.143202	0.139503	0.133888	0.141689	0.145436	0.108417	0.113633	0.101391	0.0967888	0.0894323	0.0991199	0.102547	0.120607	0.114595	0.111724	0.09888	0.101077	0.11208	0.111402	0.0989712	0.0964633	0.0938462
	166	0.663734	0.559717	0.544499	0.560309	0.563521	0.375737	0.385478	0.388907	0.16225	0.177388	0.149331	0.131209	0.133293	0.116114	0.121323	0.169421	0.207275	0.204555	0.0950404	0.0957572	0.0788796	0.0457371		0.141734	0.142436	0.139806	0.142082	0.138383	0.132737	0.140537	0.144325	0.105086	0.11013	0.0974473	0.091432	0.084881	0.0946501	0.0973755	0.119718	0.108392	0.10821	0.103707	0.105805	0.108919	0.103614	0.0954198	0.0928593	0.0903095
	035	0.574124	0.49729	0.52487	0.516192	0.519301	0.731207	0.819655	0.755803	0.459506	0.52303	0.475253	0.464607	0.487538	0.51234	0.526655	0.567982	0.646836	0.621192	0.544902	0.567588	0.592772	0.583699	0.581091		0.0810883	0.0640218	0.0601809	0.0685973	0.0683259	0.0694157	0.0721398	0.152025	0.143305	0.129017	0.157258	0.144358	0.134387	0.131896	0.114002	0.112697	0.115288	0.13359	0.133596	0.144055	0.149559	0.0939615	0.0928288	0.0952735
	036	0.56535	0.454611	0.425236	0.43579	0.438487	0.7955	0.887987	0.808444	0.482136	0.53792	0.529115	0.51764	0.494598	0.499097	0.521184	0.676686	0.719767	0.670955	0.578103	0.610146	0.636156	0.60169	0.613975	0.303606		0.0621127	0.0645925	0.0601139	0.0539095	0.0583727	0.060795	0.149299	0.146876	0.13084	0.13964	0.127662	0.134206	0.126997	0.104776	0.10825	0.116947	0.122634	0.124047	0.132948	0.139515	0.0985954	0.0979509	0.098069
	153	0.576409	0.384245	0.384669	0.384619	0.387161	0.753617	0.845557	0.812764	0.474245	0.516746	0.515475	0.504017	0.480683	0.505892	0.520413	0.667345	0.691617	0.612839	0.579062	0.558593	0.584138	0.571237	0.568623	0.212124	0.199306		0.0154917	0.0214195	0.0318142	0.0322202	0.0278158	0.142881	0.146078	0.142996	0.145267	0.141356	0.153518	0.148471	0.108924	0.111546	0.123484	0.123443	0.12489	0.122904	0.128312	0.0904087	0.0875671	0.0917533
	203	0.602332	0.408118	0.40872	0.408645	0.411305	0.748865	0.840446	0.814952	0.478414	0.521275	0.520012	0.508399	0.484863	0.510309	0.524989	0.676324	0.693493	0.614497	0.584231	0.560103	0.585706	0.576269	0.573626	0.205839	0.21798	0.015664		0.0257696	0.0349761	0.0354095	0.0311551	0.13865	0.142673	0.137404	0.147998	0.144076	0.149829	0.151265	0.10559	0.108245	0.119947	0.1253	0.125413	0.125102	0.130641	0.0917178	0.0888362	0.0930739
	151	0.546206	0.387558	0.388006	0.387952	0.390507	0.743085	0.833417	0.806028	0.469361	0.510111	0.508829	0.497596	0.474561	0.499421	0.513709	0.658342	0.682105	0.60463	0.571498	0.552938	0.578395	0.565648	0.563048	0.250412	0.182284	0.0315932	0.0475443		0.02242	0.0330836	0.0286245	0.145773	0.149003	0.144311	0.141219	0.137422	0.149443	0.142557	0.102331	0.104967	0.116506	0.121495	0.122915	0.12076	0.126022	0.0934983	0.0886968	0.0929496
	134	0.561961	0.413554	0.414196	0.414114	0.416795	0.71399	0.802637	0.775743	0.444719	0.485201	0.483826	0.47298	0.450106	0.47469	0.48869	0.630976	0.655852	0.579999	0.54782	0.526887	0.552088	0.539594	0.537061	0.252066	0.15848	0.0640397	0.0803261	0.031674		0.0222443	0.0273349	0.137412	0.14073	0.13665	0.144076	0.132738	0.144561	0.133359	0.0935537	0.101251	0.107077	0.118174	0.119529	0.117095	0.122212	0.0905422	0.0858827	0.0900687
	023	0.611057	0.398339	0.398858	0.398794	0.401359	0.742402	0.834076	0.8052	0.449458	0.506156	0.504837	0.49348	0.470083	0.495316	0.509797	0.656458	0.682282	0.603996	0.570506	0.550121	0.575815	0.562484	0.559879	0.253874	0.178295	0.0644204	0.0808087	0.0651246	0.0319653		0.0151726	0.139625	0.142925	0.138452	0.148052	0.136408	0.148369	0.139891	0.103932	0.112234	0.118337	0.12497	0.126398	0.123812	0.129185	0.0822058	0.0820974	0.0861381
	141	0.592198	0.374051	0.374395	0.374356	0.376794	0.770232	0.863424	0.833907	0.47307	0.530182	0.52896	0.51725	0.493732	0.519196	0.533922	0.682678	0.709068	0.629563	0.595229	0.57506	0.600966	0.586889	0.584242	0.272853	0.196671	0.048068	0.0643132	0.048594	0.0481097	0.015642		0.14308	0.146229	0.141436	0.143042	0.139307	0.151306	0.1428	0.107077	0.11544	0.121619	0.127837	0.129309	0.12698	0.132504	0.0847968	0.0848058	0.0888923
	155	0.910717	0.644394	0.634354	0.644513	0.648415	0.613327	0.614449	0.603859	0.321023	0.353742	0.459983	0.46395	0.436825	0.460594	0.452112	0.457084	0.59387	0.541293	0.434935	0.475782	0.477017	0.472513	0.448203	0.639498	0.602718	0.552105	0.540997	0.560446	0.526285	0.532785	0.557134		0.0224489	0.0804044	0.0795602	0.0727539	0.0776545	0.120571	0.0945475	0.104031	0.106741	0.109716	0.111842	0.128828	0.125649	0.102738	0.0992706	0.102027
	161	0.878274	0.656945	0.646794	0.657072	0.661034	0.618946	0.620093	0.62061	0.331092	0.364592	0.473159	0.477285	0.449553	0.473791	0.465094	0.44474	0.595027	0.542126	0.439757	0.476259	0.477501	0.485354	0.460546	0.598053	0.578517	0.563426	0.557152	0.571916	0.53738	0.543947	0.568441	0.03191		0.0758844	0.0735379	0.0667304	0.0681656	0.114589	0.100654	0.109738	0.11228	0.110109	0.107857	0.134702	0.131388	0.107434	0.103959	0.106671
	181	0.818471	0.614	0.644151	0.649447	0.653337	0.616231	0.638482	0.62098	0.362475	0.386666	0.435524	0.439245	0.412946	0.390665	0.395908	0.453604	0.494342	0.498615	0.412143	0.441827	0.44298	0.47281	0.44347	0.527506	0.513088	0.562234	0.54575	0.566215	0.53189	0.535357	0.559904	0.312379	0.286785		0.0479778	0.0419492	0.040717	0.111714	0.111873	0.107784	0.11057	0.109563	0.109598	0.135318	0.12697	0.101785	0.0985142	0.0977606
	188	0.776748	0.628246	0.618327	0.628355	0.632188	0.657618	0.679851	0.673365	0.325005	0.363872	0.41166	0.415173	0.389438	0.367472	0.372513	0.412729	0.461462	0.465673	0.380194	0.419001	0.420104	0.431368	0.402748	0.655	0.525077	0.563013	0.5709	0.554151	0.56468	0.574147	0.561362	0.282052	0.255015	0.133166		0.0163666	0.0334063	0.103757	0.111802	0.109455	0.112425	0.103993	0.10508	0.134689	0.126098	0.100475	0.0933053	0.0958257
	024	0.782493	0.615452	0.60581	0.615552	0.619261	0.6058	0.627848	0.622561	0.291407	0.329262	0.374538	0.377666	0.353282	0.332225	0.336846	0.375538	0.421152	0.425164	0.345221	0.381196	0.382184	0.393731	0.366631	0.604135	0.48048	0.551974	0.559612	0.543411	0.517458	0.526092	0.550446	0.25222	0.226928	0.111542	0.0158904		0.0266827	0.0955573	0.103783	0.101274	0.104532	0.0947135	0.0956866	0.125446	0.11773	0.091836	0.0855174	0.0878449
	178	0.822975	0.655701	0.645708	0.655825	0.659724	0.652163	0.673793	0.624899	0.341928	0.380007	0.427433	0.431001	0.405482	0.383801	0.388866	0.438215	0.466408	0.470521	0.39599	0.424857	0.425944	0.446749	0.418365	0.5609	0.482307	0.605465	0.598529	0.596068	0.568973	0.578388	0.60345	0.288463	0.24227	0.110135	0.0640215	0.0459128		0.095807	0.100719	0.0988406	0.101711	0.103558	0.100903	0.13611	0.12782	0.100783	0.0946435	0.0968755
	037	0.839668	0.63112	0.61465	0.631607	0.63518	0.609827	0.68157	0.584786	0.368098	0.411731	0.374576	0.366409	0.386572	0.408078	0.427808	0.392371	0.543843	0.562111	0.391357	0.434333	0.455643	0.467567	0.440601	0.57259	0.569703	0.626702	0.634852	0.606316	0.566324	0.585319	0.609449	0.457827	0.445181	0.530079	0.479842	0.440635	0.46135		0.117726	0.109561	0.108721	0.12068	0.121829	0.125012	0.124736	0.110297	0.107216	0.104522
	016	0.919873	0.731147	0.720223	0.731329	0.735705	0.664237	0.673248	0.692605	0.375754	0.394265	0.424671	0.445696	0.433139	0.456252	0.450657	0.477692	0.603228	0.534258	0.465695	0.562922	0.551206	0.537185	0.534424	0.483493	0.400364	0.42513	0.416531	0.392762	0.360367	0.398058	0.419997	0.329043	0.359627	0.508332	0.453299	0.414785	0.412606	0.477691		0.0393063	0.0403402	0.0944947	0.0965194	0.11358	0.117643	0.0904342	0.0862229	0.0886422
	156	0.863191	0.700564	0.704743	0.705057	0.709265	0.59558	0.613756	0.634777	0.397845	0.396673	0.368575	0.388767	0.375967	0.397991	0.410039	0.401348	0.571632	0.505024	0.412135	0.481687	0.471247	0.484755	0.452486	0.457099	0.401577	0.410664	0.402194	0.378318	0.355707	0.394237	0.416733	0.397684	0.430636	0.478475	0.447168	0.409172	0.407048	0.468334	0.0947804		0.0321866	0.089824	0.0918051	0.106176	0.110113	0.0805309	0.0805715	0.0789493
	170	0.908413	0.743908	0.748359	0.748565	0.752978	0.577118	0.594541	0.668284	0.37223	0.390425	0.386364	0.406504	0.393976	0.415994	0.428174	0.419506	0.556332	0.511267	0.411421	0.500323	0.489717	0.477408	0.451537	0.464336	0.43666	0.451613	0.442305	0.417392	0.383073	0.423396	0.446339	0.387156	0.419978	0.468052	0.436667	0.398799	0.396728	0.453422	0.0965182	0.0622331		0.102445	0.104689	0.11405	0.111567	0.0850454	0.0851475	0.083276
	100	0.707729	0.648789	0.65995	0.648711	0.652619	0.576957	0.591184	0.580504	0.308451	0.332735	0.359138	0.380574	0.366857	0.370207	0.369409	0.44698	0.507486	0.439464	0.341786	0.467514	0.457099	0.426838	0.437869	0.558305	0.497979	0.519281	0.523738	0.515484	0.493124	0.508084	0.531739	0.431601	0.413507	0.413332	0.40113	0.363731	0.417344	0.514089	0.379683	0.387487	0.430407		0.0155514	0.0887776	0.0944818	0.0939106	0.08715	0.0897575
	174	0.712807	0.653704	0.664946	0.653568	0.65752	0.574045	0.588191	0.554279	0.331599	0.356453	0.383284	0.404982	0.391452	0.395033	0.394252	0.449512	0.480956	0.414581	0.364785	0.442163	0.432171	0.451083	0.462598	0.558501	0.501385	0.52284	0.524219	0.518993	0.49647	0.511602	0.535416	0.435874	0.405736	0.413555	0.403387	0.365716	0.4097	0.517041	0.383296	0.391083	0.434551	0.0157179		0.0909222	0.096847	0.0956675	0.0893861	0.0917357
	049	0.794521	0.609011	0.594142	0.567723	0.571227	0.498658	0.519187	0.549394	0.277475	0.298048	0.290692	0.283189	0.304919	0.308439	0.305383	0.399556	0.459579	0.478356	0.404302	0.417958	0.441815	0.448498	0.423717	0.556406	0.550178	0.483631	0.487917	0.479997	0.454933	0.469447	0.493738	0.520316	0.535558	0.540833	0.543754	0.49661	0.559135	0.524509	0.464029	0.431644	0.482315	0.317165	0.34065		0.022817	0.0863965	0.078557	0.0809798
	050	0.827235	0.639116	0.623657	0.596887	0.600528	0.471916	0.491339	0.520311	0.274479	0.294805	0.28968	0.282208	0.303899	0.299603	0.296659	0.388326	0.449066	0.483147	0.393327	0.406443	0.429797	0.448448	0.412382	0.585597	0.580856	0.510742	0.515287	0.506876	0.481515	0.496769	0.521309	0.513726	0.528648	0.521195	0.523733	0.478667	0.539049	0.525254	0.490408	0.457353	0.476506	0.342295	0.366243	0.0322072		0.0906682	0.0823701	0.0849005
	129	0.669561	0.487666	0.490358	0.490979	0.493935	0.568283	0.632754	0.645567	0.243061	0.272397	0.301191	0.294119	0.27421	0.294983	0.314675	0.447449	0.540234	0.481587	0.375739	0.396504	0.418292	0.428418	0.404869	0.408818	0.388651	0.356257	0.359054	0.362111	0.340192	0.308342	0.328411	0.308135	0.334905	0.400446	0.381069	0.34441	0.397603	0.427856	0.298842	0.283318	0.306096	0.332564	0.355861	0.307082	0.330573		0.0213832	0.0153213
	126	0.657268	0.499057	0.504109	0.495857	0.498827	0.555037	0.617597	0.611262	0.223902	0.252773	0.280949	0.274253	0.254498	0.275044	0.294614	0.424852	0.515793	0.458353	0.355149	0.389743	0.411254	0.421399	0.39817	0.389662	0.387627	0.350099	0.352809	0.352729	0.33138	0.307533	0.327588	0.301306	0.327621	0.373959	0.347013	0.312575	0.363622	0.420565	0.290557	0.29857	0.321172	0.284039	0.30634	0.2769	0.299399	0.0312521		0.015139
	128	0.667486	0.500104	0.502889	0.503504	0.506544	0.533918	0.595764	0.624885	0.220131	0.248553	0.276266	0.269732	0.250238	0.270498	0.289823	0.418139	0.507801	0.451173	0.349618	0.383627	0.404873	0.415028	0.392102	0.412359	0.387159	0.35961	0.362445	0.362345	0.340529	0.316101	0.336588	0.306971	0.333628	0.372183	0.353041	0.318037	0.369716	0.413951	0.295697	0.280461	0.302966	0.306231	0.328887	0.281019	0.303856	0.0156365	0.0153642
	130	0.661981	0.502596	0.507708	0.499354	0.502359	0.579611	0.643363	0.636673	0.225278	0.272727	0.301459	0.294401	0.274538	0.295263	0.314903	0.447184	0.519375	0.461465	0.357391	0.411214	0.432907	0.424052	0.400662	0.397543	0.391518	0.357506	0.360306	0.360211	0.329507	0.305813	0.325751	0.303606	0.330038	0.376474	0.349278	0.31455	0.365953	0.3987	0.270525	0.318307	0.301459	0.285884	0.308339	0.297693	0.32044	0.047061	0.015314	0.0308468
	127	0.703769	0.532964	0.535958	0.536543	0.539765	0.587611	0.652781	0.682594	0.243566	0.289458	0.318508	0.311188	0.291328	0.312107	0.331722	0.465373	0.539715	0.481296	0.375787	0.428739	0.450556	0.44251	0.419041	0.431845	0.396716	0.379172	0.38216	0.382021	0.335375	0.311362	0.331533	0.321597	0.347968	0.38553	0.381005	0.344539	0.397447	0.435862	0.29004	0.296225	0.297363	0.332726	0.355966	0.32511	0.348639	0.0474102	0.0465769	0.0310691
	125	0.672326	0.503662	0.506484	0.507099	0.510175	0.558436	0.621489	0.650754	0.221466	0.268238	0.296506	0.289614	0.270008	0.290449	0.309851	0.440201	0.511294	0.454206	0.351801	0.404839	0.426268	0.417615	0.394531	0.420563	0.391058	0.36728	0.370209	0.370092	0.338567	0.314298	0.334664	0.309318	0.33609	0.374686	0.355366	0.320067	0.372106	0.392351	0.27542	0.300155	0.283285	0.308229	0.331045	0.30211	0.325197	0.0313953	0.0308468	0.0154335
	124	0.660471	0.510146	0.512987	0.513592	0.51668	0.566991	0.631071	0.660665	0.217884	0.272334	0.301054	0.294002	0.274143	0.294863	0.314503	0.44679	0.517536	0.46048	0.357725	0.410817	0.432518	0.410917	0.388215	0.412819	0.38509	0.360067	0.362907	0.362806	0.336523	0.31244	0.332663	0.277223	0.302951	0.341616	0.349278	0.314714	0.365866	0.422827	0.302448	0.304622	0.309623	0.314346	0.337242	0.306922	0.330341	0.031874	0.031309	0.0156677
	121	0.675227	0.507166	0.510011	0.510624	0.51372	0.561084	0.624713	0.654211	0.223649	0.269	0.297405	0.290469	0.27078	0.291311	0.310797	0.441907	0.5147	0.457389	0.354429	0.406296	0.427849	0.420351	0.397233	0.40996	0.37488	0.357451	0.360256	0.360161	0.314238	0.290588	0.310585	0.299297	0.325332	0.3634	0.358186	0.322729	0.3749	0.413025	0.294907	0.301045	0.30219	0.310785	0.333717	0.303073	0.326277	0.0314393	0.0308892	0.0154537
	122	0.670999	0.504561	0.507372	0.507982	0.511045	0.584102	0.648624	0.626123	0.242541	0.288194	0.317064	0.309805	0.29005	0.310714	0.330226	0.462959	0.536696	0.478746	0.374042	0.383992	0.40529	0.398323	0.375547	0.406252	0.366317	0.354206	0.35696	0.356779	0.311068	0.288905	0.308788	0.300862	0.32701	0.383671	0.379113	0.342915	0.395491	0.390324	0.303211	0.309216	0.310362	0.331154	0.354252	0.323568	0.346953	0.0321924	0.0464304	0.0309723
	162	0.654935	0.463385	0.498903	0.488379	0.491283	0.476256	0.532117	0.544951	0.181979	0.200011	0.229263	0.223672	0.204678	0.224276	0.24319	0.386494	0.464075	0.418434	0.331058	0.299219	0.319905	0.331559	0.311644	0.532496	0.437988	0.439615	0.443296	0.437047	0.413437	0.427372	0.450199	0.358384	0.369981	0.407784	0.392795	0.354743	0.409567	0.394874	0.380416	0.363268	0.359593	0.332441	0.355824	0.275971	0.281202	0.187067	0.180114	0.180293
	011	0.710053	0.529202	0.557151	0.548004	0.551259	0.462497	0.519106	0.47053	0.260314	0.279893	0.319303	0.311836	0.291612	0.312774	0.32352	0.360173	0.546381	0.479505	0.354588	0.351851	0.37366	0.384742	0.363793	0.391653	0.444195	0.364781	0.367705	0.3623	0.340247	0.351999	0.373476	0.349725	0.377273	0.445614	0.464604	0.423151	0.48048	0.420918	0.352026	0.32384	0.348118	0.259771	0.281746	0.264193	0.285756	0.144991	0.121336	0.139668
	138	0.724491	0.505311	0.532916	0.524143	0.527281	0.393904	0.445891	0.585245	0.220565	0.23992	0.278544	0.271859	0.252029	0.272646	0.282578	0.399252	0.416741	0.358892	0.341921	0.352096	0.373691	0.360135	0.36392	0.375717	0.433372	0.316922	0.319434	0.314872	0.293553	0.30261	0.323521	0.409357	0.42201	0.432226	0.451244	0.410123	0.467405	0.466066	0.339098	0.316403	0.335479	0.247673	0.269878	0.225912	0.246884	0.185172	0.144678	0.163782
	012	0.706861	0.49073	0.51793	0.509446	0.512491	0.420692	0.474324	0.569627	0.212423	0.231353	0.269143	0.262746	0.243336	0.263487	0.273066	0.387306	0.443754	0.384164	0.331273	0.341035	0.362243	0.357215	0.352878	0.373351	0.430564	0.314992	0.317474	0.312968	0.291785	0.300743	0.321522	0.396589	0.408832	0.418966	0.43769	0.397618	0.453876	0.452709	0.337019	0.295871	0.333453	0.238733	0.260413	0.217975	0.238436	0.178325	0.139048	0.157594
	008	0.667508	0.456894	0.48343	0.475525	0.478384	0.431242	0.48638	0.540305	0.192265	0.211094	0.248534	0.242539	0.223312	0.243209	0.252347	0.370845	0.447772	0.388006	0.308221	0.311999	0.332583	0.343916	0.321993	0.374758	0.432252	0.316143	0.318641	0.314103	0.292845	0.301859	0.322712	0.342388	0.353304	0.385557	0.403776	0.365841	0.420154	0.425704	0.316441	0.307794	0.331077	0.212708	0.233655	0.201655	0.222151	0.13844	0.101263	0.118995
	108	0.677892	0.465166	0.492003	0.483916	0.486835	0.434433	0.489397	0.543182	0.192265	0.211094	0.248534	0.242539	0.223312	0.243209	0.252347	0.364791	0.457819	0.396754	0.309974	0.319167	0.340134	0.351507	0.331332	0.381645	0.439989	0.32209	0.324667	0.319982	0.29842	0.307695	0.328834	0.372722	0.384448	0.394646	0.413179	0.374287	0.429659	0.428765	0.344524	0.316916	0.340788	0.217925	0.239321	0.198607	0.218772	0.159589	0.121019	0.139317
	144	0.69378	0.485117	0.48996	0.48207	0.484919	0.490811	0.501787	0.598971	0.185487	0.203897	0.230179	0.224523	0.205365	0.225134	0.244216	0.389009	0.464417	0.408697	0.332956	0.342755	0.363957	0.374941	0.35456	0.447277	0.442145	0.373118	0.376143	0.370604	0.348389	0.359076	0.380744	0.382711	0.394826	0.453518	0.422474	0.382721	0.439004	0.412736	0.351838	0.34031	0.36448	0.248669	0.271003	0.221956	0.242689	0.142761	0.104474	0.122722
	136	0.673866	0.494877	0.499835	0.491742	0.494658	0.508444	0.519918	0.568726	0.202009	0.220302	0.246835	0.240915	0.221835	0.241575	0.260557	0.405785	0.481878	0.425954	0.349401	0.359525	0.38069	0.391304	0.370966	0.441351	0.452191	0.381818	0.384951	0.379208	0.356654	0.36769	0.389671	0.396038	0.408206	0.42034	0.43536	0.395709	0.407013	0.42529	0.36889	0.356968	0.38111	0.266075	0.288375	0.23824	0.25898	0.158614	0.120313	0.13849
	149	0.680321	0.497209	0.502196	0.494052	0.496985	0.486101	0.496865	0.593539	0.183349	0.201607	0.227619	0.222053	0.203052	0.222652	0.241588	0.385203	0.459927	0.404641	0.32962	0.33928	0.360336	0.371324	0.351076	0.449834	0.441926	0.372911	0.375934	0.370399	0.348187	0.358867	0.380534	0.374266	0.38604	0.443824	0.413338	0.374499	0.429786	0.404066	0.348236	0.336876	0.360878	0.245826	0.267974	0.219525	0.240082	0.140757	0.102964	0.120981
	157	0.699813	0.488282	0.493195	0.485186	0.488076	0.494078	0.551992	0.603557	0.186209	0.204711	0.231156	0.225452	0.20619	0.22607	0.245258	0.391148	0.467371	0.411076	0.334606	0.344514	0.365881	0.376909	0.356371	0.449981	0.444872	0.375141	0.378205	0.372593	0.350203	0.361014	0.382857	0.384945	0.397205	0.456441	0.425079	0.384895	0.441711	0.41516	0.3537	0.342038	0.366396	0.24981	0.272291	0.222864	0.243718	0.143263	0.104812	0.123134
	142	0.610387	0.522055	0.527247	0.51873	0.521781	0.486725	0.543816	0.490881	0.183251	0.201516	0.227543	0.221974	0.202961	0.222574	0.241525	0.35576	0.460424	0.40492	0.302247	0.297668	0.318449	0.330192	0.31018	0.391443	0.421996	0.393119	0.396305	0.39061	0.368102	0.380612	0.402468	0.351343	0.378883	0.455705	0.42547	0.38671	0.441508	0.374328	0.351381	0.339863	0.364037	0.25951	0.281366	0.243018	0.264198	0.124562	0.102089	0.119957
	154	0.694441	0.503194	0.50826	0.49998	0.502958	0.497811	0.556053	0.607818	0.187902	0.206525	0.233185	0.227409	0.208022	0.228037	0.247342	0.394173	0.470933	0.4143	0.337256	0.347276	0.368758	0.379782	0.359138	0.45689	0.444443	0.374876	0.377933	0.372335	0.349985	0.360772	0.382574	0.380731	0.392856	0.451837	0.420643	0.380793	0.43729	0.410926	0.328336	0.317543	0.341361	0.252067	0.274696	0.22479	0.245785	0.140396	0.10269	0.120666
	152	0.624785	0.465137	0.469841	0.462207	0.464975	0.477587	0.533458	0.535125	0.179975	0.197945	0.223456	0.218049	0.199349	0.218627	0.237275	0.378517	0.451863	0.397471	0.323889	0.292278	0.312709	0.324383	0.304697	0.426597	0.41938	0.357323	0.360224	0.354812	0.332514	0.344255	0.365981	0.330574	0.341507	0.419	0.388967	0.35122	0.405736	0.336982	0.330787	0.319876	0.343822	0.241153	0.26293	0.21559	0.235807	0.12719	0.104182	0.122413
	146	0.647328	0.446644	0.451228	0.443815	0.446514	0.487583	0.544719	0.595715	0.162594	0.2019	0.227983	0.222397	0.20335	0.222998	0.241982	0.38612	0.410845	0.357502	0.286646	0.340009	0.361147	0.346829	0.326914	0.43064	0.413234	0.353848	0.356737	0.351459	0.331379	0.341716	0.363467	0.355783	0.367157	0.424547	0.385855	0.348479	0.40256	0.385479	0.329746	0.337591	0.342859	0.20259	0.224176	0.21986	0.240471	0.140921	0.103067	0.121111
	143	0.664757	0.477135	0.481985	0.474097	0.47695	0.495912	0.553837	0.556609	0.187352	0.205917	0.193165	0.188195	0.207406	0.227353	0.246594	0.350323	0.423527	0.412827	0.336168	0.346125	0.367522	0.37853	0.357966	0.411138	0.442826	0.373607	0.376642	0.371085	0.348823	0.359542	0.381257	0.37936	0.391411	0.450139	0.419094	0.379459	0.435699	0.365535	0.355354	0.343634	0.368029	0.251252	0.273796	0.185919	0.206425	0.140017	0.102424	0.120349
	139	0.665867	0.478173	0.48303	0.475127	0.477985	0.472637	0.529738	0.580993	0.168297	0.18682	0.21281	0.207445	0.188213	0.208007	0.227187	0.371577	0.446367	0.390774	0.315831	0.325285	0.346545	0.357933	0.337487	0.433212	0.420383	0.352442	0.355305	0.350076	0.327957	0.338149	0.359767	0.356869	0.368477	0.426989	0.396293	0.357589	0.413248	0.387512	0.334072	0.322957	0.347172	0.230461	0.252835	0.205	0.225717	0.122228	0.0851668	0.102922
	135	0.661613	0.475841	0.480646	0.472832	0.475659	0.495026	0.552776	0.554395	0.187134	0.205673	0.232185	0.226453	0.207159	0.227075	0.246287	0.39223	0.468375	0.412166	0.335697	0.303413	0.324456	0.336208	0.315957	0.429	0.41025	0.349134	0.351944	0.34665	0.324617	0.336064	0.357554	0.358741	0.370427	0.449362	0.418397	0.37887	0.434977	0.364225	0.343514	0.331955	0.356619	0.250916	0.27342	0.223854	0.244742	0.124851	0.102324	0.120228
	132	0.657232	0.475109	0.479952	0.472077	0.474927	0.464091	0.520322	0.57102	0.164708	0.182936	0.208419	0.203217	0.184287	0.203757	0.222652	0.36477	0.438247	0.383498	0.30993	0.319126	0.340101	0.35148	0.331296	0.428645	0.420248	0.352253	0.355117	0.349886	0.327755	0.337949	0.359581	0.352606	0.363992	0.421783	0.391518	0.353438	0.408354	0.383006	0.327679	0.316874	0.340756	0.225549	0.247563	0.200842	0.221221	0.122918	0.0856349	0.103492
	137	0.65302	0.472797	0.477587	0.469802	0.472621	0.486232	0.543126	0.54477	0.183241	0.201497	0.227507	0.221943	0.202941	0.222542	0.24148	0.385181	0.46001	0.404641	0.329549	0.297566	0.318322	0.330052	0.310066	0.424484	0.410106	0.348945	0.351755	0.34646	0.324414	0.335863	0.357367	0.35444	0.365902	0.443882	0.41335	0.374464	0.429821	0.360016	0.336897	0.325659	0.349988	0.245712	0.267865	0.219415	0.239974	0.125567	0.102887	0.120896
	140	0.653291	0.469745	0.47452	0.466764	0.469574	0.497869	0.55613	0.57426	0.187645	0.206284	0.232966	0.227187	0.207782	0.227815	0.247142	0.394145	0.470975	0.414292	0.337164	0.320804	0.341889	0.353288	0.333001	0.419988	0.410811	0.344794	0.347561	0.346268	0.324211	0.335441	0.356878	0.359552	0.371165	0.45472	0.423491	0.383505	0.440091	0.385086	0.33525	0.324026	0.348418	0.251859	0.274517	0.224568	0.245584	0.122834	0.105331	0.123752
	030	1.77523	1.69482	1.73406	1.73406	1.73406	2.3992	2.38202	2.26519	1.97498	1.99405	2.00511	2.00095	2.01229	2.01126	2.01443	2.10752	2.30936	2.25842	2.05999	2.03904	2.02058	1.94304	1.88758	1.77801	1.61029	1.63197	1.62354	1.64553	1.62093	1.58939	1.58939	1.88341	1.90305	1.85857	1.81567	1.81567	1.81895	1.96084	1.95423	1.90537	1.90772	1.74159	1.73179	1.91974	1.93489	1.76012	1.77934	1.77934
	027	1.95095	2.00812	2.01343	2.01343	2.01343	1.888	1.90217	1.83269	1.89324	1.87701	2.07694	2.07262	2.00178	2.00067	1.99105	2.14039	2.2442	2.22146	2.09233	2.06239	2.09192	2.09692	2.10294	1.58627	1.65995	1.60928	1.57914	1.66725	1.69225	1.72782	1.72782	1.74728	1.81984	1.76113	1.87319	1.87319	1.8109	1.89164	1.81615	1.86395	1.76301	1.70947	1.73469	1.96212	1.92546	1.91119	1.91336	1.91336
	029	1.65564	1.70206	1.70971	1.70971	1.70971	1.86284	1.85179	1.7682	1.69121	1.72691	1.85822	1.84081	1.87949	1.87845	1.8686	1.81121	2.04638	2.02518	1.83601	1.92134	1.91234	1.80925	1.81435	1.39366	1.50512	1.41889	1.39493	1.47006	1.49093	1.51871	1.51871	1.66144	1.62316	1.67382	1.75066	1.75066	1.67236	1.72312	1.70579	1.76256	1.67111	1.63352	1.62869	1.78074	1.74682	1.69667	1.70035	1.70035
	031	1.79305	1.63147	1.63992	1.63992	1.63992	1.6929	1.74487	1.74187	1.63264	1.55092	1.66833	1.63514	1.68184	1.68077	1.66907	1.8798	1.83963	1.81787	1.82754	1.78091	1.7338	1.60902	1.61399	1.503	1.44886	1.33974	1.31622	1.36488	1.38527	1.37067	1.37067	1.54951	1.54245	1.63124	1.69539	1.69539	1.61575	1.66695	1.63033	1.67378	1.58301	1.57889	1.57393	1.64573	1.6115	1.68261	1.70487	1.70487
	051	2.00701	2.02974	2.03469	2.03469	2.03469	1.95147	1.86211	1.93338	1.92585	1.92226	2.04772	2.01093	2.06541	2.06433	2.0556	2.11227	2.20269	2.2039	2.07076	2.15783	2.12395	1.98413	1.98978	1.70257	1.70928	1.60372	1.58718	1.65886	1.68255	1.71611	1.71611	1.78371	1.82639	1.91538	1.96665	1.96665	1.9033	1.88616	1.85628	1.90132	1.806	1.75663	1.75991	1.91465	1.8795	2.00201	2.00329	2.00329
	115	1.8279	2.01281	1.92844	1.96294	1.96294	2.41914	2.40253	2.27914	2.02334	2.04069	2.15286	2.13762	2.01989	2.03718	2.00734	2.33098	2.29804	2.23032	2.2882	2.24558	2.2763	2.21837	2.21702	1.90181	1.42055	1.71203	1.77302	1.71722	1.69026	1.69731	1.69731	2.41226	2.3562	2.05036	2.06957	2.06957	2.11225	2.22688	2.13415	2.22161	2.24796	2.06062	2.08149	1.82824	1.96211	1.99798	2.00877	2.02178
	025	1.38658	1.32945	1.28495	1.29655	1.33019	1.36635	1.36559	1.36861	1.28652	1.34259	1.39997	1.40379	1.41562	1.40307	1.41305	1.52174	1.45137	1.47196	1.36128	1.5342	1.51127	1.44374	1.42768	1.4204	1.37419	1.37348	1.3874	1.34544	1.34653	1.37156	1.38426	1.33105	1.38084	1.40038	1.38322	1.38643	1.44309	1.56269	1.42537	1.44965	1.32246	1.37971	1.42733	1.25146	1.1932	1.15058	1.12034	1.12986
	107	1.5336	1.43089	1.38495	1.39701	1.40366	1.65143	1.6572	1.57994	1.46334	1.52504	1.54209	1.54092	1.54941	1.53598	1.54621	1.67011	1.75939	1.74753	1.53038	1.67429	1.66047	1.58859	1.57114	1.4041	1.34741	1.3912	1.40489	1.34566	1.36399	1.40853	1.40289	1.39378	1.44439	1.48671	1.46935	1.49214	1.4768	1.55672	1.44504	1.46908	1.45299	1.43984	1.48924	1.31577	1.25118	1.27373	1.25372	1.26422
	028	1.32933	1.40238	1.34259	1.35231	1.35905	1.75628	1.77693	1.70107	1.53205	1.66064	1.59453	1.56469	1.5663	1.52758	1.54816	1.58552	1.58919	1.58642	1.52496	1.54504	1.59055	1.584	1.53659	1.44787	1.32144	1.374	1.35155	1.34836	1.2873	1.34512	1.37487	1.51751	1.63323	1.49885	1.58461	1.53415	1.51041	1.5981	1.45228	1.41279	1.41212	1.47818	1.49526	1.34157	1.32359	1.41851	1.38067	1.38992
	114	1.32793	1.41986	1.3601	1.36984	1.37656	1.72849	1.70359	1.6753	1.52622	1.58762	1.52416	1.49614	1.49768	1.4607	1.48054	1.56342	1.58875	1.58606	1.52629	1.52457	1.56849	1.57682	1.5305	1.40931	1.37156	1.30839	1.28704	1.28418	1.30867	1.36667	1.39644	1.47493	1.58576	1.44668	1.51515	1.46831	1.48613	1.58832	1.45041	1.3936	1.41104	1.48078	1.49751	1.32681	1.30933	1.40166	1.36513	1.3741
	052	1.3728	1.39109	1.39774	1.37717	1.3842	1.61176	1.70637	1.64509	1.55209	1.64682	1.61694	1.58572	1.5874	1.59759	1.61901	1.6851	1.62225	1.62801	1.54037	1.53789	1.5841	1.59046	1.59514	1.42923	1.31532	1.31122	1.29083	1.31423	1.28383	1.28152	1.27981	1.45	1.53611	1.50539	1.51505	1.55686	1.51002	1.48155	1.46112	1.48479	1.49449	1.35141	1.38003	1.28043	1.33234	1.29359	1.33841	1.35836
	109	1.26022	1.13758	1.14231	1.12453	1.13058	1.25517	1.32678	1.36882	1.19169	1.12298	1.14147	1.15202	1.137	1.17516	1.19425	1.36924	1.24027	1.20794	1.31557	1.2672	1.27042	1.18414	1.17881	1.19573	1.21404	0.949394	0.933487	0.941424	0.971817	1.00164	0.982137	1.19642	1.25042	1.23761	1.14463	1.24835	1.2764	1.35854	1.15549	1.10577	1.11666	1.14494	1.16974	1.00801	1.02009	1.14271	1.07326	1.08739
	026	1.19171	1.30447	1.31023	1.29134	1.29779	1.53707	1.57799	1.47663	1.49393	1.39138	1.48203	1.49449	1.47407	1.49328	1.51235	1.63317	1.53193	1.51934	1.55215	1.44663	1.45002	1.34591	1.41155	1.48016	1.40584	1.27749	1.27172	1.27686	1.26861	1.3019	1.30036	1.36402	1.39608	1.47524	1.44727	1.48582	1.51433	1.58904	1.42405	1.50547	1.45281	1.22563	1.21789	1.33928	1.35129	1.32303	1.26771	1.28509
	087	1.19236	1.30544	1.31122	1.29228	1.29874	1.58493	1.62643	1.51136	1.4898	1.38742	1.47802	1.49047	1.4701	1.4893	1.5084	1.6386	1.56849	1.55551	1.54827	1.48017	1.48364	1.34204	1.40766	1.46451	1.40706	1.27837	1.25919	1.27773	1.26946	1.30285	1.30131	1.33074	1.40119	1.45933	1.45207	1.49072	1.5192	1.5943	1.38981	1.47001	1.41908	1.2218	1.24769	1.33519	1.34722	1.31909	1.2639	1.28122
	022	1.71365	1.97001	2.01303	1.97892	1.97892	1.91372	1.99107	1.9919	1.68759	1.89537	1.95652	1.91975	1.877	1.87602	1.87881	2.00735	2.14541	1.99538	1.87916	2.02143	2.08445	1.9632	1.97791	1.44	1.45555	1.50623	1.5546	1.46064	1.39519	1.42835	1.42835	1.86746	1.80163	1.94281	1.85644	1.85644	1.86685	1.7661	1.53014	1.52968	1.59104	1.40471	1.41716	1.71981	1.77506	1.51094	1.44103	1.49643
	088	1.70745	1.82418	1.86725	1.83374	1.83374	1.67133	1.82846	1.82777	1.49859	1.72819	1.76687	1.73088	1.71007	1.69323	1.69567	1.80103	2.00991	1.89694	1.70939	1.81867	1.87858	1.73982	1.73424	1.3408	1.63582	1.54832	1.52346	1.56616	1.56151	1.52428	1.52428	1.71403	1.74319	1.9182	1.86494	1.86494	1.93232	1.79813	1.6364	1.6194	1.69676	1.50381	1.53732	1.67143	1.67151	1.4709	1.41185	1.4667
	020	1.00348	0.803585	0.810595	0.781458	0.795187	0.97766	1.10142	0.973692	0.948941	0.813746	0.850175	0.857731	0.848311	0.847566	0.86405	1.06192	1.00937	1.02597	1.07413	0.897997	0.900258	0.998509	0.953941	1.12295	1.01154	0.972558	0.932461	0.972043	0.912446	0.906713	0.91926	0.952027	0.970262	0.942653	0.965107	0.982552	1.00829	1.04168	1.12977	1.03841	1.00915	1.01792	1.01843	0.940496	0.923546	1.04925	1.05296	1.0701
	113	1.0412	0.826983	0.833975	0.804446	0.818405	1.01903	1.14546	1.014	0.98633	0.852226	0.890242	0.898111	0.88811	0.887356	0.904021	1.10607	1.036	1.0528	1.10172	0.938191	0.940535	1.03569	0.990001	1.16523	1.00981	1.0123	0.97173	1.01155	0.972851	0.966463	0.979453	0.999119	1.01746	0.990592	1.00309	1.02038	1.04609	1.095	1.15327	1.0524	1.0323	1.04459	1.04509	0.983429	0.965845	1.09445	1.09802	1.11585
	202	1.23203	1.20691	1.21343	1.2222	1.23933	1.46176	1.54628	1.48362	1.34486	1.24352	1.28949	1.27943	1.22105	1.23129	1.24053	1.54846	1.37402	1.36462	1.49621	1.29736	1.31001	1.22112	1.27296	1.48208	1.32974	1.31797	1.2718	1.3212	1.28024	1.30115	1.31729	1.28501	1.30373	1.17072	1.25687	1.27255	1.29751	1.48269	1.50465	1.49284	1.44235	1.40176	1.40212	1.3832	1.37524	1.4486	1.44794	1.44493
	116	0.973345	0.851227	0.851227	0.851227	0.851227	1.32988	1.38518	1.09406	1.1144	1.00346	0.950946	0.950946	0.975674	0.975674	0.975674	1.13604	1.07254	1.07591	1.08321	0.997515	0.997515	1.13516	1.06106	0.999883	0.884241	0.882389	0.924861	0.933438	0.871224	0.85858	0.85858	1.11046	1.15289	1.20877	1.21057	1.21057	1.21117	1.10224	1.21219	1.15644	1.23426	1.04733	1.05837	0.972859	1.01416	0.988329	0.995481	0.995481
	058	1.01736	0.968442	0.968442	0.968442	0.968442	1.47542	1.5346	1.4411	1.1929	1.25754	1.23201	1.23201	1.22776	1.22776	1.22776	1.2849	1.27567	1.24522	1.15898	1.15697	1.15697	1.34649	1.26096	1.00635	0.874327	0.840524	0.882483	0.886369	0.825811	0.827304	0.827304	1.12896	1.10103	1.27223	1.24522	1.24522	1.24612	1.25026	1.24248	1.18469	1.26596	1.13069	1.14292	1.11092	1.15658	1.08557	1.09278	1.09278
	048	1.05708	1.04197	1.04197	1.04197	1.04197	1.46233	1.52204	1.41601	1.21282	1.2797	1.30119	1.30119	1.29701	1.29701	1.29701	1.35246	1.34486	1.31306	1.21666	1.21993	1.21993	1.41821	1.32762	1.09646	0.98043	0.939974	0.985403	0.989307	0.923005	0.925757	0.925757	1.12677	1.12401	1.36481	1.32299	1.32299	1.33638	1.20537	1.2611	1.2485	1.33562	1.09904	1.1114	1.06689	1.11142	1.08249	1.08985	1.08985
	077	0.98399	0.963884	0.963884	0.963884	0.963884	1.44932	1.50832	1.40397	1.1688	1.23326	1.20774	1.20774	1.20343	1.20343	1.20343	1.25822	1.25183	1.22154	1.13274	1.1341	1.1341	1.32245	1.2378	1.01511	0.908609	0.869349	0.912285	0.916192	0.853976	0.855811	0.855811	1.08878	1.08603	1.26931	1.23035	1.23035	1.24317	1.22331	1.21474	1.15653	1.23788	1.06126	1.07287	1.08748	1.13274	1.0452	1.05246	1.05246
	110	1.03445	0.86809	0.86809	0.86809	0.86809	1.55596	1.70353	1.47084	1.34467	1.34804	1.32241	1.32241	1.3184	1.3184	1.3184	1.48924	1.34546	1.314	1.41076	1.22158	1.22158	1.38169	1.2965	1.15504	1.01122	0.977456	1.02386	1.0277	0.95979	0.963049	0.963049	1.26233	1.25985	1.45896	1.40276	1.40276	1.40472	1.33615	1.46041	1.35623	1.44707	1.26066	1.27473	1.24677	1.29627	1.24697	1.25377	1.25377
	096	1.12299	0.978607	0.978607	0.978607	0.978607	1.50216	1.56544	1.55849	1.29645	1.30106	1.29964	1.29964	1.27184	1.27184	1.27184	1.55152	1.34232	1.28947	1.37118	1.29882	1.29882	1.34201	1.29503	1.16293	1.10026	0.982113	0.995589	1.03173	0.964626	0.967903	0.967903	1.22719	1.24444	1.45915	1.39167	1.39167	1.50374	1.51322	1.38223	1.29123	1.39613	1.18815	1.24813	1.18577	1.23345	1.15136	1.15842	1.15842
	095	1.01967	0.950968	0.950968	0.950968	0.950968	1.40231	1.47278	1.44339	1.17572	1.18339	1.15869	1.15869	1.15438	1.15438	1.15438	1.38418	1.22815	1.19847	1.24231	1.11282	1.11282	1.25093	1.17417	1.13305	1.04078	0.92573	0.938262	0.973795	0.90935	0.911869	0.911869	1.16534	1.18075	1.34675	1.29394	1.29394	1.39009	1.33255	1.40446	1.30442	1.39064	1.05042	1.10633	1.0865	1.13138	1.08547	1.09259	1.09259
	094	1.01058	0.941606	0.941606	0.941606	0.941606	1.477	1.53946	1.50642	1.16817	1.17602	1.15135	1.15135	1.14701	1.14701	1.14701	1.38353	1.29406	1.26429	1.24371	1.17748	1.17748	1.26881	1.19435	1.12255	1.03119	0.916737	0.929106	0.964503	0.900555	0.902956	0.902956	1.15929	1.17461	1.36572	1.31275	1.31275	1.40899	1.35782	1.39834	1.32609	1.41254	1.06833	1.12442	1.08724	1.13188	1.07922	1.08636	1.08636
	099	1.01246	0.913684	0.913684	0.913684	0.913684	1.41265	1.47033	1.50855	1.11063	1.11982	1.11633	1.11633	1.0911	1.0911	1.0911	1.38883	1.25812	1.20694	1.22555	1.12292	1.12292	1.21147	1.13996	1.13051	1.04919	0.919852	0.932183	0.967358	0.90372	0.906145	0.906145	1.12685	1.13608	1.33462	1.27084	1.27084	1.37735	1.36284	1.37807	1.30657	1.39202	1.03141	1.08637	1.05288	1.09669	1.04653	1.05378	1.05378
	098	1.04631	0.963933	0.963933	0.963933	0.963933	1.47018	1.53155	1.5361	1.16516	1.173	1.17011	1.17011	1.14436	1.14436	1.14436	1.40297	1.31233	1.26018	1.23981	1.17452	1.17452	1.26466	1.19121	1.1673	1.08419	0.968831	0.981847	1.01721	0.951903	0.954945	0.954945	1.15657	1.17164	1.37159	1.30782	1.30782	1.41413	1.37676	1.39225	1.32096	1.40623	1.06682	1.12212	1.10622	1.15092	1.07754	1.0846	1.0846
	091	1.01051	0.926359	0.926359	0.926359	0.926359	1.42951	1.48846	1.49535	1.12546	1.13433	1.13099	1.13099	1.10549	1.10549	1.10549	1.36139	1.27349	1.22183	1.20107	1.13701	1.13701	1.22637	1.15403	1.12783	1.04702	0.932234	0.944809	0.980224	0.915808	0.9184	0.9184	1.11914	1.13346	1.33081	1.26739	1.26739	1.37331	1.33632	1.35075	1.28025	1.36441	1.02929	1.08398	1.06711	1.11137	1.03969	1.04689	1.04689
	097	0.97773	0.891241	0.891241	0.891241	0.891241	1.39718	1.52425	1.46385	1.09021	1.10009	1.09632	1.09632	1.07079	1.07079	1.07079	1.3274	1.24067	1.18885	1.16751	1.10385	1.10385	1.19348	1.12133	1.09286	1.01335	0.898115	0.91037	0.946119	0.882058	0.884257	0.884257	1.08586	1.09966	1.29703	1.23312	1.23312	1.34006	1.30297	1.31668	1.24594	1.33027	0.995059	1.04971	1.0318	1.07612	1.00528	1.01265	1.01265
	017	0.501012	0.657069	0.66008	0.666847	0.679404	1.23466	1.31118	1.17628	1.01525	1.05506	1.02166	1.00097	1.00746	1.00664	1.0249	1.05236	1.19808	1.18324	0.974827	1.0122	1.04652	1.01433	0.977505	0.838554	0.777482	0.767767	0.797746	0.798436	0.759842	0.78856	0.784533	1.247	1.22339	1.12633	1.16953	1.16803	1.15169	1.07873	1.24435	1.20417	1.24248	1.00431	1.01229	1.08108	1.11876	1.03691	1.03314	1.0423
	015	0.593788	0.739499	0.680927	0.708286	0.692998	1.07596	1.1201	0.994145	0.797095	0.793503	0.872129	0.854785	0.860182	0.891738	0.89184	0.867773	1.03627	0.97554	0.855785	0.876957	0.907011	0.876621	0.84308	0.892985	0.809288	0.853267	0.883221	0.856663	0.820703	0.837357	0.865136	0.878908	0.878163	1.09102	1.08976	1.03553	1.05535	0.771361	0.933471	0.977786	0.92102	0.918492	0.925766	0.962652	0.947907	0.853594	0.85129	0.850871
	019	0.591739	0.708815	0.696432	0.685218	0.694086	1.08711	1.15476	0.954329	0.874015	0.854173	0.91765	0.899776	0.905361	0.937339	0.954112	0.980176	1.10138	1.08744	0.969521	0.932216	0.962936	0.94464	0.911503	0.825146	0.783678	0.777824	0.806145	0.781101	0.773157	0.789052	0.806832	0.863778	0.893875	1.03448	1.06736	1.03284	0.994135	0.861617	1.00913	1.00253	0.970868	0.918161	0.925204	0.966149	0.951546	0.799374	0.764361	0.796833
	018	0.865523	1.03856	1.07686	1.07686	1.07686	1.3077	1.38682	1.33079	1.25596	1.22868	1.27132	1.24341	1.25207	1.2511	1.2511	1.34674	1.40694	1.39147	1.31522	1.28714	1.33341	1.25893	1.23194	1.19403	1.02968	1.02275	1.0609	1.0218	1.01129	1.04246	1.04246	1.42442	1.46528	1.53957	1.51579	1.51579	1.61464	1.33853	1.35816	1.42524	1.45541	1.27743	1.28947	1.16652	1.2108	1.17081	1.18294	1.18294
	021	0.777601	0.918908	0.898386	0.898386	0.898386	1.26663	1.32778	1.17159	1.06998	1.16265	1.2201	1.19505	1.19666	1.19576	1.19576	1.14691	1.32102	1.30131	1.1186	1.206	1.24712	1.22289	1.17313	1.11162	0.966045	0.986136	1.02251	0.948149	0.928184	0.95132	0.95132	1.15807	1.19494	1.24916	1.26776	1.26776	1.2462	1.00998	1.28223	1.29437	1.3777	1.0564	1.06559	1.0355	1.07446	1.02066	1.01374	1.01374
		Estimates of Evolutionary Divergence between Sequences The number of amino acid substitutions per site from between sequences are shown. Standard error estimate(s) are shown above the diagonal. Analyses were conducted using the JTT matrix-based model [1]. This analysis involved 110 amino acid sequences. All ambiguous positions were removed for each sequence pair (pairwise deletion option). There …
[truncated: 62 more columns]
