# Supplementary material for: Where are the Penaeids crustins?
Source: PeerJ. 2023 Jul 20;11:e15596. doi: 10.7717/peerj.15596 (PMC10363340; doi:10.7717/peerj.15596)
Supplement: Table S9 — The list also includes similar sequences reported under another name, such as antileukoproteinase, WAP/4-DSC-containing protein, or under another name unrelated to the defense system or as uncharacterized proteins. [file peerj-11-15596-s009.xlsx]

## Sheet: Sheet1
		signature number	Accesion number	Sequence name	Sequencing Technology	RefSeq
	Type I
	PENJA	51	UGN74323	crustin I-3	Sanger	N
		52	UGN74322	crustin I-2	Sanger	N
		88	BBD52152	WAP four-disulfide core domain containing-like	Sanger	N
	PENSE	158	AAL36896	putative antimicrobial peptide	Sanger	N
	PENPE	59	QCQ82549	crustin fp1	Sanger	N
	PENVA	87	ATU82299	carcinin-like protein	Sanger	N
		26	QOL09952	type Ib crustin cruIb-1	RNAseq	N
		119	XP_027208060	uncharacterized protein LOC113801830	WGS	Y
		120	ROT82064	putative antimicrobial peptide	WGS	N	iden
		133	XP_027208057	LOW QUALITY PROTEIN: uncharacterized protein LOC113801827	WGS	Y	sim
		26	QOL09952	type Ib crustin cruIb-1	RNAseq	N
		87	ATU82299	carcinin-like protein	Sanger	N	iden
		32	QOL09943	type Ia crustin cruIa-2	RNAseq	N
		118	XP_027208059	uncharacterized protein LOC113801828 isoform X2	WGS	Y	iden
		118	XP_027208058	uncharacterized protein LOC113801828 isoform X1	WGS	Y	iden
		119	XP_027208060	uncharacterized protein LOC113801830	WGS	Y	sim
		114	XP_027219667	antileukoproteinase-like	WGS	Y
		202	QOL09967	type IIb crustin cruIIb-2	RNAseq	N
		22	QOL09959	type IIa crustin cruIIa-5	RNAseq	N
		25	QOL09953	type Ib crustin cruIb-2	RNAseq	N
		27	QOL09948	type Ia crustin cruIa-7	RNAseq	N
		28	QOL09947	type Ia crustin cruIa-6	RNAseq	N
		29	QOL09946	type Ia crustin cruIa-5	RNAseq	N
		30	QOL09945	type Ia crustin cruIa-4	RNAseq	N
		31	QOL09944	type Ia crustin cruIa-3	RNAseq	N
	Type II
	PENSU	8	ABO93323	crustin	Sanger	N
	PENPA	8	ABM63361	crustin	Sanger	N
	PENBR	11	ABQ96197	crustin	Sanger	N
	PENSC	12	ABM63362	crustin	Sanger	N
	PENSE	108	AAL36897	putative antimicrobial peptide	Sanger	N
	PENJA	36	BBC42585	crustin type 9	Sanger	N
		36	XP_042865729	probable glycoprotein hormone G-protein coupled receptor	WGS	Y
	PENMO	49	BCG55622	crustin isoform 4-B3 antimicrobial peptide	Sanger	N
		49	BCG55620	crustin isoform 4-B1 antimicrobial peptide	Sanger	N
		49	ACQ66005	crustin Pm4 antimicrobial peptide	Sanger	N
		50	BCG55621	crustin isoform 4-B2 antimicrobial peptide	Sanger	N
	PENJA	100	BAD15062	crustin-like peptide, partial	Sanger	N
		100	BAD15066	crustin-like peptide type 5, partial	Sanger	N
		100	BAD15065	crustin-like peptide type 4, partial	Sanger	N
		100	BAD15064	crustin-like peptide type 3, partial	Sanger	N
		100	BAD15063	crustin-like peptide type 2	Sanger	N
		174	XP_042858712	keratin, type II cytoskeletal 3-like	WGS	Y
	PENVA	108	XP_027208055	small cysteine and glycine repeat-containing protein 2-like	WGS	Y
		108	AAL36892	putative antimicrobial peptide	Sanger	N
		108	AAL36891	putative antimicrobial peptide	Sanger	N
		108	AAL36894	putative antimicrobial peptide	Sanger	N
		138	AAL36895	putative antimicrobial peptide	Sanger	N
		15	QOL09968	type IIb crustin cruIIb-3	RNAseq	N
		17	QOL09964	type IIa crustin cruIIa-10	RNAseq	N
	Type III
	PENSE	145	AAL36898	putative antimicrobial peptide	Sanger	N
	PENMN	48	UKP15100	crustin protein	Sanger	N
	PENPE	58	QCQ82550	crustin fp2	Sanger	N
	PENIN	77	ACV84092	crustin-like antimicrobial peptide	Sanger	N
	PENJA	35	BBD52151	crustin 7	Sanger	N
		35	XP_042882156	probable glycoprotein hormone G-protein coupled receptor	WGS	Y
		37	BBC42584	crustin type 8	Sanger	N
		37	XP_042865726	small cysteine and glycine repeat-containing protein 2-like	WGS	Y
	PENMO	74	ACQ66004	crustin Pm1 antimicrobial peptide	Sanger	N
		74	ABW82154	crustin-like protein	Sanger	N
		74	XP_037772832	uncharacterized protein LOC119568402	WGS	Y
		91	AGA83302	crustin-like antimicrobial peptide	Sanger	N
		91	ACL97378	crustin-like antimicrobial peptide	Sanger	N
		91	ACL97376	crustin-like antimicrobial peptide	Sanger	N
		97	ACL97377	crustin-like antimicrobial peptide	Sanger	N
		98	ACL97375	crustin-like antimicrobial peptide	Sanger	N
		99	ACL97374	crustin-like antimicrobial peptide	Sanger	N
		94	ACT82963	crustin-like antimicrobial peptide type 2	Sanger	N
		95	ADV17347	antimicrobial peptide	Sanger	N
		96	ADC32522	crustin-like peptide	Sanger	N
		113	XP_037792256	calcium-binding protein P-like	WGS	Y
		178	XP_037772780	small cysteine and glycine repeat-containing protein 2-like	WGS	Y
	PENVA	18	QOL09963	type IIa crustin cruIIa-9	RNAseq	N
		19	QOL09962	type IIa crustin cruIIa-8	RNAseq	N
		20	QOL09961	type IIa crustin cruIIa-7	RNAseq	N
		20	XP_027227947	41 kDa spicule matrix protein-like	WGS	Y	iden
		21	QOL09960	type IIa crustin cruIIa-6	RNAseq	N
		21	XP_027213162	cuticle protein 64-like	WGS	Y	iden
		24	QOL09955	type IIa crustin cruIIa-1	RNAseq	N
		24	XP_027208066	DEAD-box ATP-dependent RNA helicase 52A-like	WGS	Y	sim
		188	XP_027208065	ctenidin-1-like	WGS	Y	sim
		116	XP_027224107	elastin-like	WGS	Y
		16	QOL09966	type IIb crustin cruIIb-1	RNAseq	N
